# Supplementary material
Source: Elsevier journal article supplement (https://rcastoragev2.blob.core.windows.net/986ba0f0df31b1956ea8e30ff3adae6c/mmc1.pdf)
Supplement: mmc1 [file mmc1.pdf]

## Supplemental Information

### CDK8 Kinase Phosphorylates Transcription Factor

#### STAT1 to Selectively Regulate the Interferon Response

Joanna Bancerek, Zachary C. Poss, Iris Steinparzer, Vitaly Sedlyarov, Thaddäus Pfaffenwimmer, Ivana Mikulic, Lars Dölken, Birgit Strobl, Mathias Müller, Dylan J. Taatjes, and Pavel Kovarik

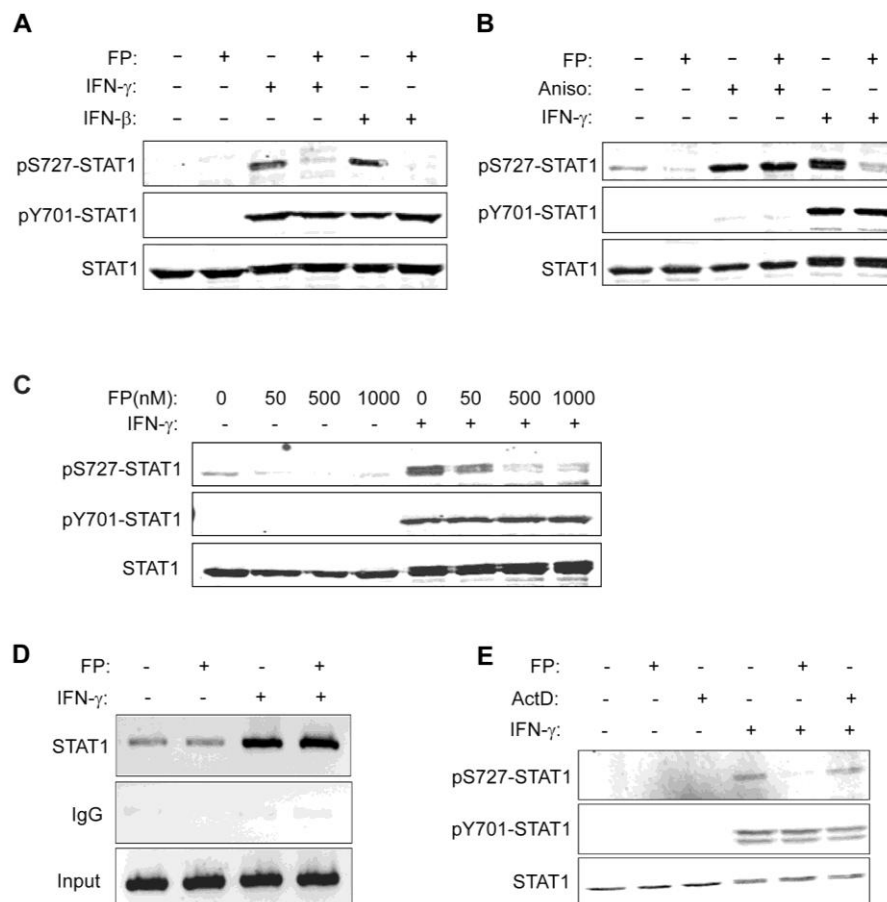

**Figure S1. Analysis of Flavopiridol Effects on IFN- and Stress-Induced S727 Phosphorylation of STAT1 in Fibroblasts (A, B and C), of Flavopiridol Effects on STAT1 Promoter Recruitment (D), and of the Effects of Transcription Inhibition on S727 Phosphorylation of STAT1 (E)**

(A) Flavopiridol inhibits IFN- $\gamma$ - and IFN- $\beta$ -induced S727 phosphorylation of STAT1 in fibroblasts. Mouse fibroblasts were stimulated for 40 min with IFN- $\gamma$  or IFN- $\beta$  after pretreatment or control treatment for 15 min with flavopiridol (FP) (500 nM). Cell extracts were analyzed by Western blotting using antibodies to phosphorylated S727 of STAT1 (pS727-STAT1), phosphorylated

Y701 of STAT1 (pY701-STAT1) and STAT1 C-terminal antibody (not recognizing the STAT1 $\beta$  isoform).

(B) Flavopiridol inhibits IFN- $\gamma$ - but not stress-induced S727 phosphorylation of STAT1 in fibroblasts. Mouse fibroblasts were stimulated for 40 min with the stress inducer anisomycin (Aniso) or IFN- $\gamma$  after pretreatment or control treatment for 15 min with flavopiridol (FP). Cell extracts were analyzed as in (A).

(C) Mouse fibroblasts were stimulated for 40 min with IFN- $\gamma$  or left untreated followed 15 min-pretreatment with flavopiridol (FP) at indicated concentrations. Cell extracts were analyzed as in (A).

(D) STAT1 promoter recruitment is not impaired by flavopiridol. MEFs were stimulated for 30 min with IFN- $\gamma$  after pretreatment or control treatment for 30 min with flavopiridol (FP). Chromatin recruitment of STAT1 was analyzed by ChIP using STAT1 antibody or unspecific IgG. A representative gel with PCR-amplified *Irf1* promoter using immunoprecipitated DNA as template is shown. Total chromatin DNA was amplified for input control.

(E) Ongoing transcription is not required for IFN- $\gamma$ -induced S727 phosphorylation of STAT1. MEFs were stimulated for 40 min with IFN- $\gamma$  after pretreatment or control treatment for 15 min with actinomycin D (ActD). Cell extracts were analyzed by Western blotting using antibodies to phosphorylated S727 of STAT1 (pS727-STAT1), phosphorylated Y701 of STAT1 (pY701-STAT1) and total STAT1.

**A** Effect of silencing of *Cdk7*, *Cdk8* or *Cdk9* on STAT1 S727 phosphorylation

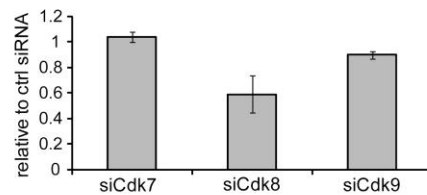

**B**

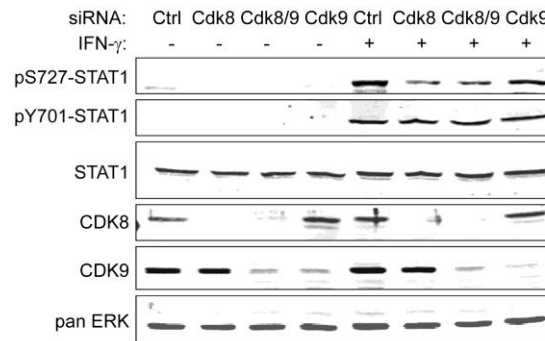

**C**

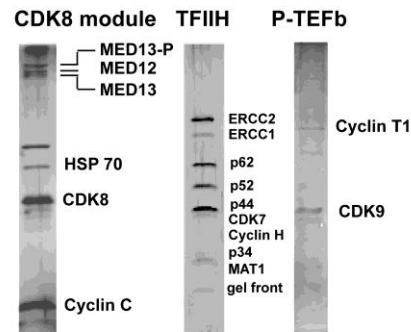

**D**

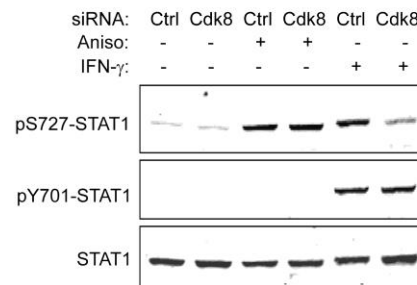

**Figure S2. Effects of *Cdk7*, *Cdk8* and *Cdk9* Silencing and of Combined *Cdk8* and *Cdk9* Silencing on STAT1 S727 Phosphorylation (A, B, D and E), and Silver-Stained Gels of Purified Kinase Complexes Used for In Vitro Kinase Assays (C)**

(A) Quantitative analysis of effects of *Cdk7*, *Cdk8* and *Cdk9* silencing on IFN- $\gamma$ -induced STAT1 S727 phosphorylation. MEFs were treated for 48 h with siRNA to *Cdk7*, *Cdk8*, *Cdk9* or control siRNA (Ctrl) and subsequently stimulated for 40 min with IFN- $\gamma$ . Cell extracts of three experiments were analyzed by Western blotting using antibodies to phosphorylated S727 of STAT1 (pS727-STAT1), phosphorylated Y701 of STAT1 (pY701-STAT1) and total STAT1. The Western blot signal was quantified using the Odyssey Imager (LI-COR Biosciences), and the pS727 signals were normalized to total STAT1 signals. Values of the normalized pS727 signals

for the individual Cdk siRNA relative to control siRNA (Ctrl) are depicted. Error bars represent standard deviations (SDs) (n = 3).

(B) Combined silencing of *Cdk8* and *Cdk9* does not result in more efficient inhibition of IFN- $\gamma$ -induced STAT1 S727 phosphorylation than silencing of *Cdk8* alone. MEFs were treated for 48 h with siRNA to *Cdk8*, *Cdk9*, both *Cdk8* + *Cdk9* (Cdk8/9), or control siRNA (Ctrl) and subsequently stimulated for 40 min with IFN- $\gamma$  or left unstimulated. Cell extracts were analyzed by Western blotting using antibodies to phosphorylated S727 of STAT1 (pS727-STAT1), phosphorylated Y701 of STAT1 (pY701-STAT1) and total STAT1. Silencing was confirmed by Western blotting of the same extracts using antibodies to CDK8 and CDK9. Equal loading was controlled by antibodies to ERK1/ERK2 (pan ERK).

(C) Silver stained gels of purified CDK8 module, TFIIH, and P-TFb used for kinase assays.

(D) Stress-induced STAT1 S727 phosphorylation is not impaired in fibroblasts silenced for *Cdk8*. Fibroblasts silenced for the expression of *Cdk8* or control-silenced cells were treated for 30 min with anisomycin (Aniso) or IFN- $\gamma$  or left untreated. Cell extracts were analyzed using antibodies to phosphorylated S727 of STAT1 (pS727-STAT1), phosphorylated Y701 of STAT1 (pY701-STAT1) and total STAT1. Note that anisomycin does not cause Y701 phosphorylation.

Figure S3

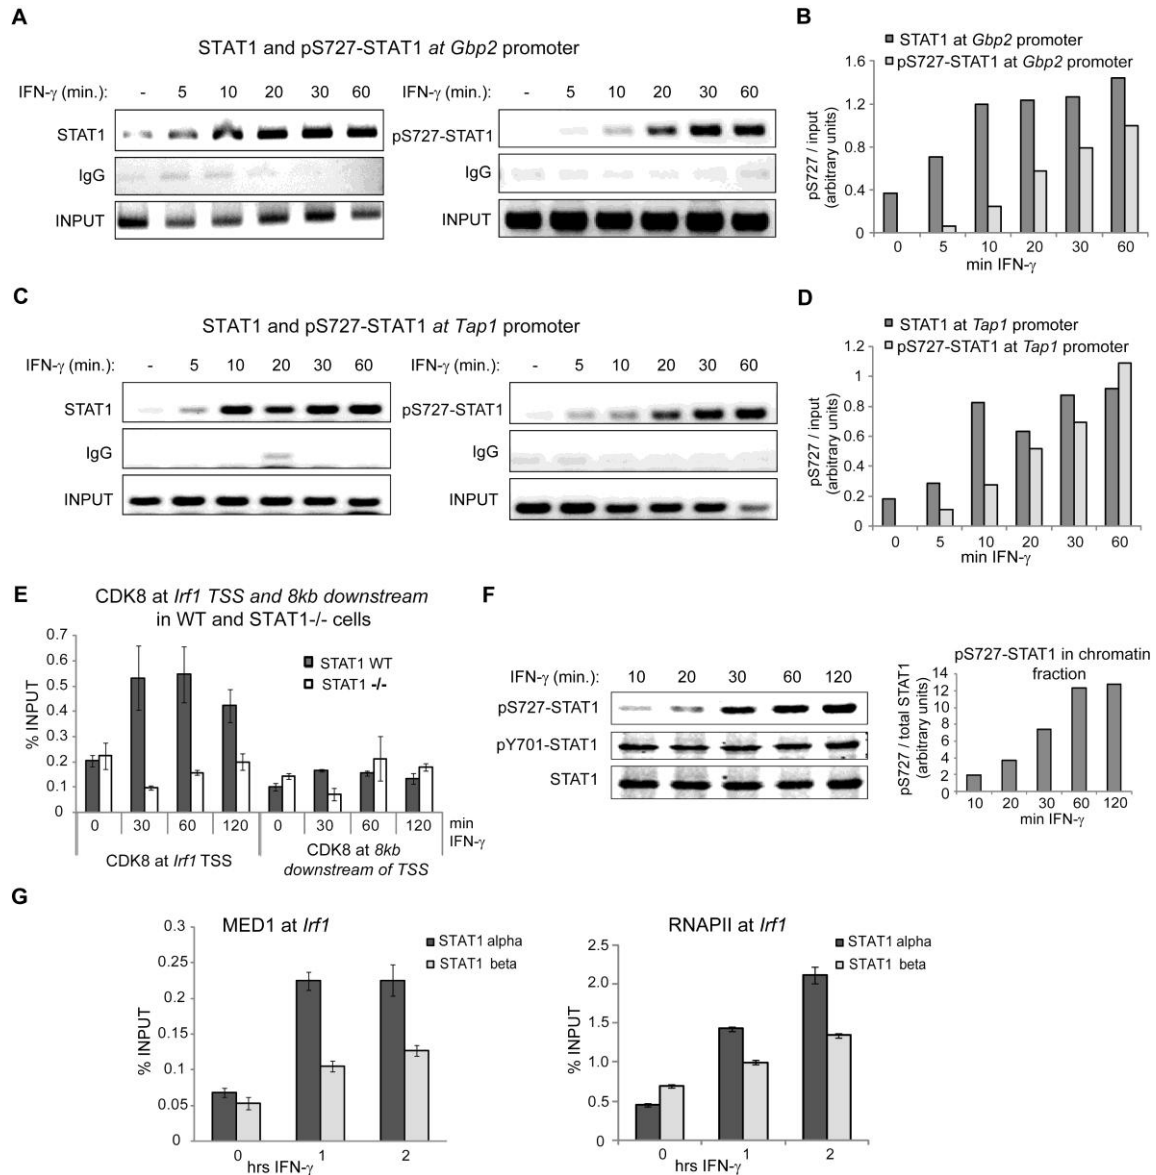

**Figure S3. Recruitment of S727-Phosphorylated STAT1 to *Gbp2* (A, B) and *Tap1* (C, D) Promoters and to Chromatin (F), STAT1-Dependent Recruitment of CDK8 to TSS and Gene Body of *Irf1* (E) and Effect of Missing TAD on Recruitment of MED1 and RNAPII (G)**

(A–D) Recruitment of STAT1 precedes accumulation of S727-phosphorylated STAT1 at the *Gbp2* and *Tap1* promoters. Mouse fibroblasts were treated for indicated times with IFN- $\gamma$  or left untreated. Association of STAT1 and S727-phosphorylated STAT1 with the *Gbp2* (A) and *Tap1* (C) promoters was examined by ChIP using respective antibodies or unspecific IgG. A representative gel with PCR-amplified *Gbp2* or *Tap1* promoters using immunoprecipitated DNA as template is shown. Total chromatin DNA was amplified for input control. Quantitative analysis (using ImageJ) of data shown in (A) and (C) is depicted in (B) and (D), respectively: the pS727 signal was normalized to input DNA after subtracting the signals of IgG.

(E) IFN- $\gamma$  induces STAT1-dependent CDK8 recruitment to the *Irf1* transcription start site (TSS) but not to the gene body. WT and STAT1<sup>-/-</sup> MEFs (right panel) were treated for indicated times

with IFN- $\gamma$ , and CDK8 recruitment to the TSS or the gene body of the *Irf1* gene was determined by ChIP. CDK8 increased after IFN- $\gamma$  treatment at the start site but not at the gene body in WT cells. No increase of CDK8 was observed in STAT1<sup>-/-</sup> cells throughout the gene. CDK8 recruitment was determined by ChIP using CDK8 antibodies or unspecific IgG. Immunoprecipitated DNA was analyzed by qPCR for the *Irf1* TSS and gene body (8 kb downstream of TSS), carried out in triplicates. Signals were normalized to input DNA. Error bars represent standard deviations (SDs) (n = 3).

(F) Accumulation of S727-phosphorylated STAT1 on chromatin reaches a plateau at approximately 60 min of IFN- $\gamma$  treatment. MEFs were treated for indicated times with IFN- $\gamma$  and processed as for ChIP analysis. The chromatin fractions were analyzed by Western blotting using antibodies to phosphorylated S727 of STAT1 (pS727-STAT1), phosphorylated Y701 of STAT1 (pY701-STAT1) and total STAT1 (left panel), and quantitated using Image Studio (Odyssey system from LI-COR) by normalizing the pS727-STAT1 signal to the STAT1 signal (right panel).

(G) MED1 and RNAPII are less efficiently recruited by STAT1beta than by STAT1alpha. MEFs derived from mice expressing solely STAT1alpha or STAT1beta were treated for indicated times with IFN- $\gamma$ . Association of MED1 (left panel) and RNAPII (right panel) with the *Irf1* TSS was examined by ChIP. Error bars represent SDs (n = 3).

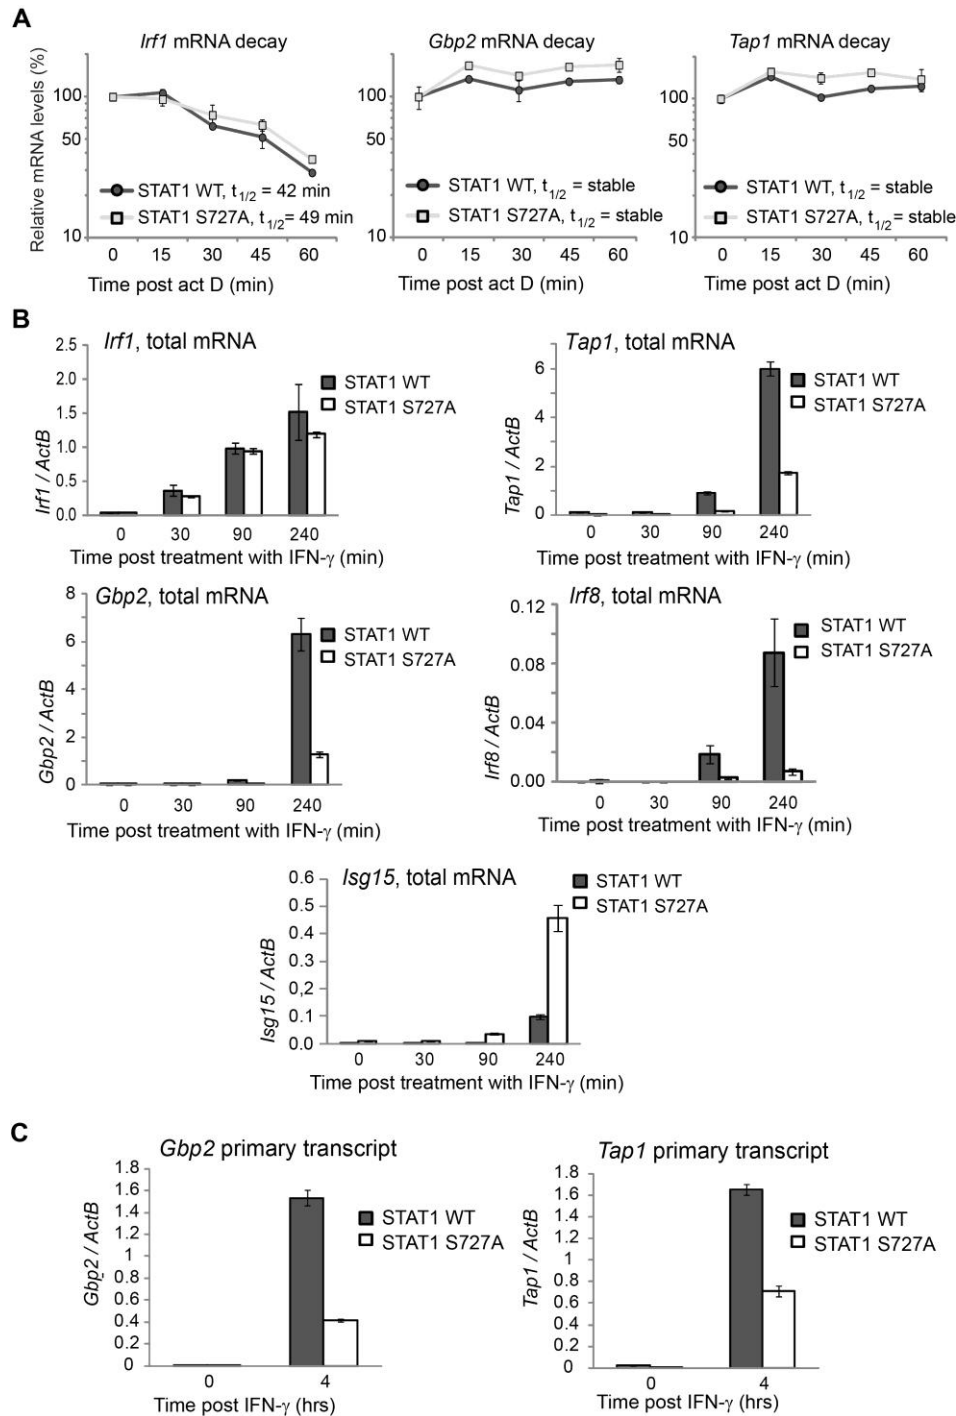

**Figure S4. Measurement of mRNA Stability (A), Total RNA Fractions from Analysis of Newly Transcribed mRNA (B) and Amounts of Primary Transcripts (C)**

(A) *Ifi1*, *Gbp2* and *Tap1* mRNA stability in STAT1 WT and S727A cells. STAT1 WT and S727A MEFs were treated with IFN- $\gamma$  for 4 h and actinomycin D (act D) was added for the indicated times. RNA was isolated, and the amounts of *Ifi1*, *Gbp2* and *Tap1* mRNA were determined by qRT-PCR. Relative values to *Hprt* are shown. Error bars represent standard deviations (SDs) ( $n = 3$ ).

(B) 4sU was added to the cell culture medium simultaneously with IFN- $\gamma$ , or 60 min and 210 min after IFN- $\gamma$  stimulation, or without IFN- $\gamma$  treatment. The labeling was performed in WT and S727A MEFs for 30 min followed by RNA isolation and separation to collect the 4sU-labeled RNA fractions and total RNA fractions. Total RNA representing accumulated RNA at 0, 30 min, 90 min and 240 min of IFN- $\gamma$  treatment is shown for *Irf1*, *Tap1*, *Gbp2*, *Irf8* and *Isg15*. mRNA was quantitated by qRT-PCR. *ActB* was used for normalization. Error bars represent SDs (n = 3).

(C) S727A mutation affects levels of primary transcripts. STAT1 WT and S727A MEFs were treated with IFN- $\gamma$  for 4 h or left untreated. RNA was isolated, and the amounts of primary transcripts of *Tap1* and *Gbp2* genes were determined by qRT-PCR for intronic amplicons. Relative values to *ActB* are shown. Error bars represent standard deviations (SDs) (n = 3).



**A**GAS, ISRE and probe positions in *Irf1*, *Gbp2* and *Tap1* genes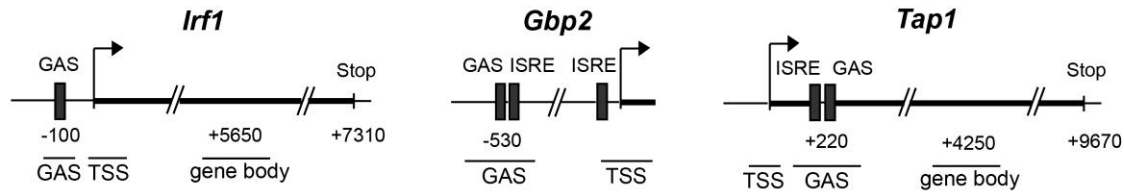**B**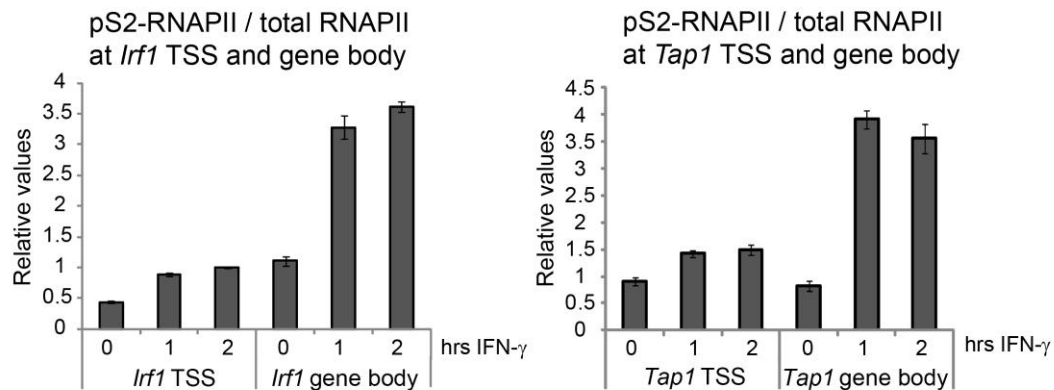

**Figure S5. Schematic Representation of the *Irf1*, *Gbp2* and *Tap1* Gene Loci (A) and Positions of ChIP Amplicons and Relative Abundance of S2-Phosphorylated RNAPII at the TSS and the Gene Body of *Irf1* and *Tap1* (C)**

(A) Positions of the regulatory GAS and ISRE elements are marked. Note that GAS and ISRE in the *Tap1* gene are downstream of the transcription start site. “Stop” marks the end of *Irf1* (GenBank NM\_001159393.1) and *Tap1* (GenBank NM\_013683.2) transcripts. Amplicons for ChIP analyses are depicted as TSS (transcription start site), GAS (GAS elements) and gene body with the approximate position relative to TSS.

(B) Ratios of S2-phosphorylated RNAPII to total RNAPII at TSS and the gene body of the *Irf1* and *Tap1* genes. WT MEFs treated for indicated times with IFN- $\gamma$  were examined by ChIP using antibodies to RNAPII and pS2-RNAPII. Immunoprecipitated DNA was analyzed by qPCR for the both TSS and the gene body of *Irf1* and *Tap1*, normalized to input DNA, and the ratios S2-phosphorylated RNAPII to total RNAPII were calculated. Error bars represent SDs (n = 3).

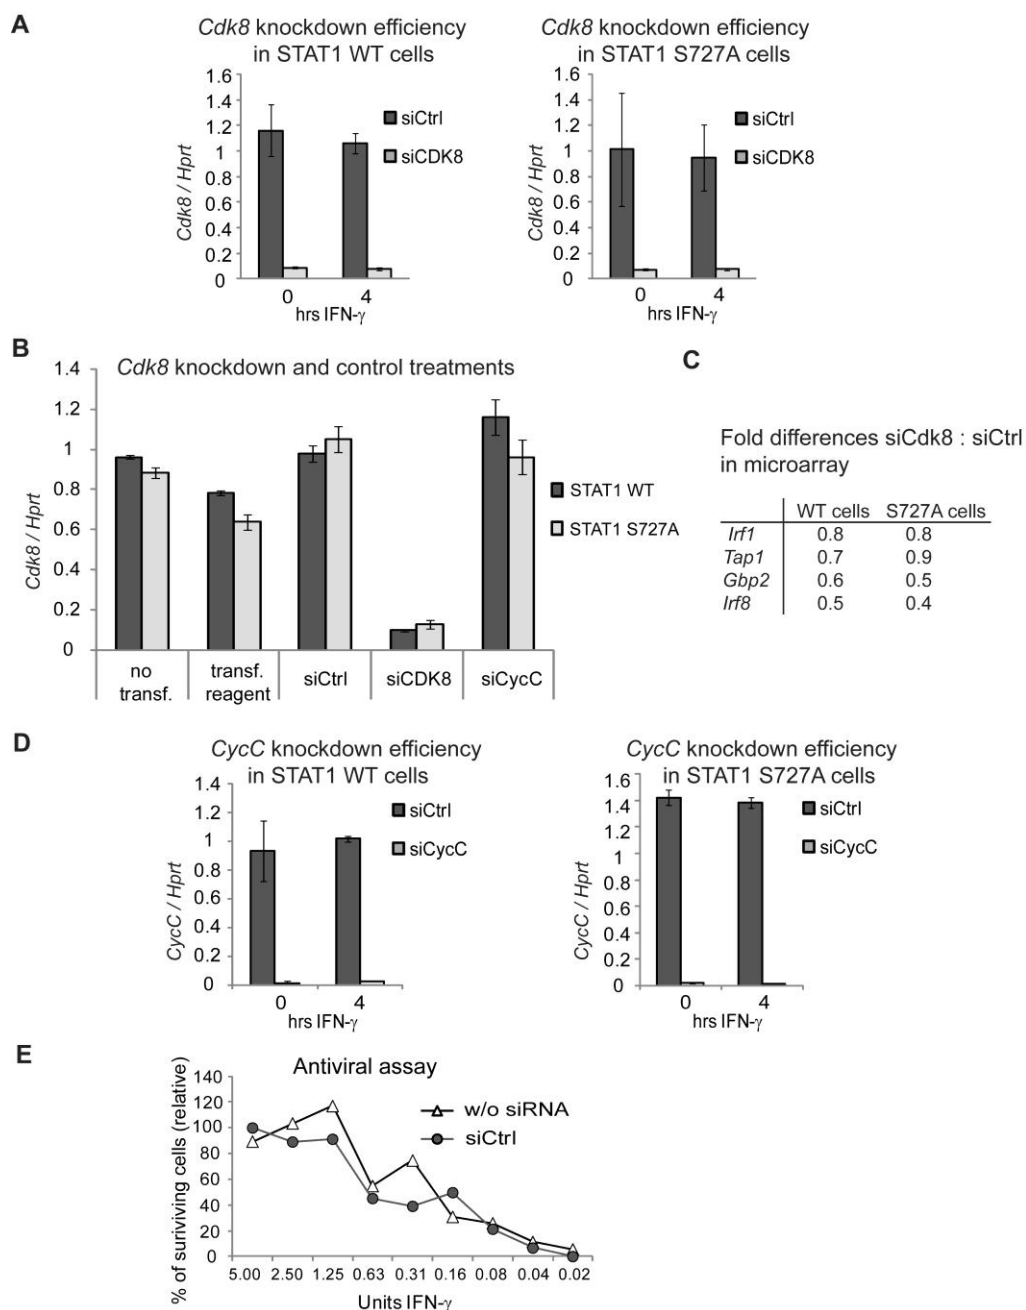

**Figure S6. Control Experiments Showing Silencing Efficiency for *Cdk8* and *CycC* (A and D), Fold Differences in Microarray (C) and no Effects of the Transfection Procedure (B and E)**

(A) Silencing efficiency of *Cdk8* by siRNA in microarray experiments. Efficiency of silencing of *Cdk8* in STAT1 WT (left panel) or STAT1 S727A (right panel) cells stimulated with IFN- $\gamma$  or left unstimulated was assessed with measurements of *Cdk8* mRNA levels using qRT-PCR. Relative values to *Hprt* are shown. Error bars represent standard deviations (SDs) of biological triplicates ( $n = 3$ ).

(B) siRNA transfection procedure has no effect on *Cdk8* expression. STAT1 WT and STAT1 S727A cells were left untreated (no transf.), treated with transfection reagent alone (transf. reagent), control siRNA (siCtrl), siRNA for *Cdk8* (siCdk8), or siRNA for *CycC* (siCycC). *Cdk8* mRNA levels were determined by qRT-PCR. Relative values to *Hprt* are shown. Error bars represent standard deviations (SDs) (n = 3).

(C) Differences in expression of *Irf1*, *Tap1*, *Gbp2* and *Irf8* observed in the microarray experiment shown in Figure 7A and 7B. Differences in IFN- $\gamma$ -induced expression levels of the indicated genes between siCdk8- and siCtrl-treated WT and S727A cells are depicted. The values are antilog numbers extracted from Table S2.

(D) Silencing efficiency of *CycC* by siRNA in experiments showing similar effect of *CycC* and CDK8 on expression of IFN- $\gamma$ -induced genes. Efficiency of silencing of *CycC* in STAT1 WT (left panel) or STAT1 S727A (right panel) cells stimulated with IFN- $\gamma$  or left unstimulated was controlled by measurements of *CycC* mRNA levels using qRT-PCR. Relative values to *Hprt* are shown. Error bars represent standard deviations (SDs) (n = 3).

(E) The procedure of siRNA transfection does not alter sensitivity of cells to VSV infection. STAT1 WT cells were treated with control siRNA (siCtrl) or were left untreated. After 24 h of incubation with IFN- $\gamma$  at indicated concentrations cells were infected with VSV (MOI = 0.1), and the cell survival was monitored as in (Figure 7F).

**Table S1. IFN- $\gamma$ -Induced Genes Significantly ( $p < 0.05$ ) Downregulated at Least 2-fold by the STAT1 S727A Mutation**

| Genbank AC         | Gene symbol          | WT-g/WT-0 | SA-g/WT-g |
|--------------------|----------------------|-----------|-----------|
| NM_001034859       | <i>Gm4841</i>        | 9.8       | -3.0      |
| NM_001033767       | <i>Gm4951</i>        | 8.7       | -1.1      |
| NM_010260          | <i>Gbp2</i>          | 8.1       | -1.8      |
| NM_018734          | <i>Gbp3</i>          | 7.0       | -1.3      |
| NM_194336          | <i>Mpa2l</i>         | 6.8       | -2.7      |
| NM_001101475       | <i>F830016B08Rik</i> | 6.5       | -2.0      |
| NM_145545          | <i>Gbp6</i>          | 6.3       | -1.0      |
| NM_001039647       | <i>Gbp11</i>         | 6.3       | -2.9      |
| NM_001168294       | <i>Serpina3f</i>     | 6.2       | -1.1      |
| NM_010724          | <i>Psemb8</i>        | 6.1       | -1.6      |
| NM_013585          | <i>Psemb9</i>        | 5.7       | -2.1      |
| NM_001135115       | <i>Gm12250</i>       | 5.2       | -1.1      |
| NM_030738          | <i>Vmn1r65</i>       | 5.2       | -1.6      |
| NM_001037713       | <i>Xaf1</i>          | 4.9       | -1.1      |
| NM_194336          | <i>Mpa2l</i>         | 4.8       | -2.3      |
| NM_013683          | <i>Tap1</i>          | 4.8       | -2.2      |
| NM_001256005       | <i>Gbp4</i>          | 4.6       | -3.2      |
| NM_008320          | <i>Irf8</i>          | 4.6       | -2.1      |
| NM_009277          | <i>Trim21</i>        | 4.2       | -1.4      |
| NM_009896          | <i>Socs1</i>         | 3.6       | -1.0      |
| NM_001045540       | <i>Gm12185</i>       | 3.5       | -1.2      |
| NM_011530          | <i>Tap2</i>          | 3.2       | -2.2      |
| NM_177820          | <i>Apol10b</i>       | 2.9       | -1.9      |
| NM_020557          | <i>Cmpk2</i>         | 2.9       | -2.1      |
| NM_021443          | <i>Ccl8</i>          | 2.5       | -2.0      |
| NM_181545          | <i>Slfn8</i>         | 2.5       | -1.8      |
| NM_020557          | <i>Cmpk2</i>         | 2.5       | -1.8      |
| NM_023835          | <i>Trim12a</i>       | 2.5       | -1.5      |
| NM_001199940       | <i>Serpina3i</i>     | 2.3       | -1.2      |
| NM_001081083       | <i>Armc3</i>         | 2.2       | -1.6      |
| NM_023835          | <i>Trim12a</i>       | 2.1       | -1.4      |
| ENSMUST00000114230 | <i>Psemb9</i>        | 1.9       | -1.0      |
| NM_199146          | <i>Trim30d</i>       | 1.9       | -2.4      |
| NM_001037713       | <i>Xaf1</i>          | 1.9       | -1.3      |
| XM_136331          | <i>Gm4955</i>        | 1.9       | -1.3      |
| NM_001146007       | <i>9230105E10Rik</i> | 1.7       | -1.6      |
| NM_181542          | <i>Slfn10-ps</i>     | 1.7       | -1.3      |
| NM_001146007       | <i>9230105E10Rik</i> | 1.7       | -1.3      |
| NM_001013828       | <i>ligp1b</i>        | 1.6       | -1.0      |
| XM_136331          | <i>Gm4955</i>        | 1.6       | -1.4      |

|              |                      |     |      |
|--------------|----------------------|-----|------|
| NM_011333    | <i>Ccl2</i>          | 1.6 | -1.6 |
| NM_029419    | <i>Apol7a</i>        | 1.6 | -1.8 |
| NM_013819    | <i>H2-M3</i>         | 1.6 | -1.5 |
| NM_001146007 | <i>9230105E10Rik</i> | 1.5 | -1.3 |
| NM_183087    | <i>Fam189a1</i>      | 1.5 | -3.3 |
| NM_001039646 | <i>Gbp10</i>         | 1.4 | -1.3 |
| NM_178745    | <i>Tmem229b</i>      | 1.4 | -1.6 |
| NM_007987    | <i>Fas</i>           | 1.4 | -1.7 |
| NM_025829    | <i>Eif4e3</i>        | 1.4 | -2.3 |
| NM_013654    | <i>Ccl7</i>          | 1.4 | -2.3 |
| NM_001190466 | <i>Dact1</i>         | 1.3 | -3.6 |
| NM_053109    | <i>Clec2d</i>        | 1.3 | -1.1 |
| NR_033577    | <i>Gm8221</i>        | 1.3 | -1.3 |
| NM_010171    | <i>F3</i>            | 1.3 | -2.1 |
| NM_175291    | <i>Dock10</i>        | 1.3 | -2.1 |
| NM_001190466 | <i>Dact1</i>         | 1.3 | -3.2 |
| NM_010555    | <i>Il1r2</i>         | 1.1 | -1.3 |
| NM_033541    | <i>Oas1c</i>         | 1.1 | -1.9 |
| NM_001083925 | <i>Oas1b</i>         | 1.1 | -1.1 |
| NM_008362    | <i>Il1r1</i>         | 1.0 | -1.4 |
| NM_029419    | <i>Apol7a</i>        | 1.0 | -1.0 |

Genes are ordered according to their induction (log 2-transformed) by IFN- $\gamma$  in WT cells (column: WT-g/WT-0). Fold difference (log 2) between S727A (SA) and WT cells is shown in the column "SA-g/WT-g". Genes that appear more than once have different probe set IDs for each listing. Data are extracted from the Table S4.

**Table S2. IFN- $\gamma$ -Induced Genes Significantly ( $p < 0.05$ ) Upregulated at Least 2-fold by the STAT1 S727A Mutation**

| Genbank AC         | Gene symbol          | WT-g/WT-0 | SA-g/WT-g |
|--------------------|----------------------|-----------|-----------|
| NM_021274          | <i>Cxcl10</i>        | 6.2       | 2.6       |
| NM_029000          | <i>Gvin1</i>         | 6.0       | 4.3       |
| NM_009251          | <i>Serpina3g</i>     | 5.3       | 1.2       |
| NM_197986          | <i>Tmem140</i>       | 4.4       | 1.1       |
| NM_001045481       | <i>Ifi203</i>        | 4.2       | 2.6       |
| NM_028967          | <i>Batf2</i>         | 4.1       | 1.7       |
| NM_008329          | <i>Ifi204</i>        | 4.0       | 2.8       |
| NM_015783          | <i>Isg15</i>         | 4.0       | 1.3       |
| NM_015783          | <i>Isg15</i>         | 3.9       | 1.5       |
| NM_001033450       | <i>Mnda</i>          | 3.7       | 2.3       |
| NM_001004174       | <i>AA467197</i>      | 3.6       | 4.0       |
| BC010546           | <i>Ifi204</i>        | 3.5       | 2.6       |
| AK019325           | <i>Gm9706</i>        | 3.4       | 1.3       |
| NM_029000          | <i>Gvin1</i>         | 3.3       | 3.9       |
| NM_007609          | <i>Casp4</i>         | 3.1       | 3.5       |
| XM_001000891       | <i>Gm1966</i>        | 3.0       | 4.2       |
| NM_007609          | <i>Casp4</i>         | 2.9       | 3.5       |
| NM_001045481       | <i>Ifi203</i>        | 2.9       | 2.5       |
| NM_001204910       | <i>Al607873</i>      | 2.8       | 2.8       |
| NM_001139519       | <i>Zbp1</i>          | 2.7       | 1.6       |
| XM_003084464       | <i>Gm16340</i>       | 2.5       | 2.8       |
| NM_178005          | <i>Lrrtm2</i>        | 2.3       | 1.0       |
| NM_033601          | <i>Bcl3</i>          | 2.1       | 2.3       |
| NM_178446          | <i>Rbm47</i>         | 2.1       | 1.9       |
| NM_172393          | <i>Aim1</i>          | 2.0       | 3.6       |
| NM_199015          | <i>D14Ert668e</i>    | 1.9       | 5.1       |
| NM_023137          | <i>Ubd</i>           | 1.9       | 1.3       |
| ENSMUST00000104958 | <i>Psme2</i>         | 1.8       | 2.3       |
| AK087205           | <i>9530082P21Rik</i> | 1.7       | 1.1       |
| NM_175475          | <i>Cyp26b1</i>       | 1.7       | 1.9       |
| AK156907           | <i>Cxcl10</i>        | 1.5       | 2.1       |
| NM_011019          | <i>Osmr</i>          | 1.4       | 1.1       |
| NM_013498          | <i>Crem</i>          | 1.4       | 2.2       |
| NM_008381          | <i>Inhbb</i>         | 1.4       | 1.9       |
| NM_009344          | <i>Phlda1</i>        | 1.3       | 1.9       |
| NM_013498          | <i>Crem</i>          | 1.3       | 2.0       |
| NM_178446          | <i>Rbm47</i>         | 1.2       | 1.8       |
| NM_010392          | <i>H2-Q2</i>         | 1.2       | 1.0       |
| NM_010942          | <i>Nsg1</i>          | 1.2       | 2.1       |
| NM_178005          | <i>Lrrtm2</i>        | 1.2       | 1.0       |
| NM_172875          | <i>Adc</i>           | 1.2       | 1.5       |
| NM_026637          | <i>Ggct</i>          | 1.1       | 1.5       |

|              |                |     |     |
|--------------|----------------|-----|-----|
| NM_009256    | <i>Serpib9</i> | 1.1 | 2.1 |
| NM_011580    | <i>Thbs1</i>   | 1.1 | 1.5 |
| NM_009780    | <i>C4b</i>     | 1.0 | 1.9 |
| NM_001033207 | <i>Nlrc5</i>   | 1.0 | 1.2 |
| NM_008599    | <i>Cxcl9</i>   | 1.0 | 2.2 |
| NM_207648    | <i>H2-Q6</i>   | 1.0 | 1.1 |

Genes are ordered according to their induction (log 2-transformed) by IFN- $\gamma$  in WT cells (column: WT-g/WT-0). Fold difference (log 2) between S727A (SA) and WT cells is shown in the column "SA-g/WT-g". Genes that appear more than once have different probe set IDs for each listing. Data are extracted from the Table S4

**Table S3. IFN- $\gamma$ -Induced Genes Not Significantly Affected by the STAT1 S727A Mutation**

| Genbank AC         | Gene symbol           | WT-g/WT-0 |
|--------------------|-----------------------|-----------|
| NM_001145164       | <i>Tgtp2</i>          | 9.5       |
| NM_018738          | <i>Igtp</i>           | 8.6       |
| NM_001146275       | <i>ligp1</i>          | 7.7       |
| NM_019440          | <i>Irgm2</i>          | 7.5       |
| NM_001033207       | <i>Nlrc5</i>          | 6.8       |
| NM_011854          | <i>Oasl2</i>          | 6.7       |
| NM_008330          | <i>Ifi47</i>          | 6.1       |
| NM_008326          | <i>Irgm1</i>          | 5.8       |
| NM_011579          | <i>Tgtp1</i>          | 5.7       |
| NM_021893          | <i>Cd274</i>          | 5.7       |
| NM_001145164       | <i>Tgtp2</i>          | 5.5       |
| NM_001039530       | <i>Parp14</i>         | 5.4       |
| NM_008326          | <i>Irgm1</i>          | 5.2       |
| ENSMUST00000073997 | <i>BC023105</i>       | 5.2       |
| NM_001168294       | <i>Serpina3f</i>      | 5.0       |
| NM_023386          | <i>Rtp4</i>           | 5.0       |
| NM_008331          | <i>Ifit1</i>          | 4.7       |
| NM_001146275       | <i>ligp1</i>          | 4.5       |
| NM_008390          | <i>Irf1</i>           | 4.3       |
| NM_030253          | <i>Parp9</i>          | 4.2       |
| NM_010501          | <i>Ifit3</i>          | 4.1       |
| NM_001013371       | <i>Dtx3l</i>          | 4.1       |
| NM_001163576       | <i>Parp10</i>         | 3.8       |
| AK034303           | <i>9330175E14Rik</i>  | 3.8       |
| NM_001005858       | <i>I830012O16Rik</i>  | 3.7       |
| NM_001168660       | <i>Apol9b</i>         | 3.5       |
| NM_001199940       | <i>Serpina3i</i>      | 3.5       |
| NM_009283          | <i>Stat1</i>          | 3.3       |
| NM_011909          | <i>Usp18</i>          | 3.3       |
| NM_019963          | <i>Stat2</i>          | 3.3       |
| NM_001163621       | <i>Apol6</i>          | 3.2       |
| NM_029219          | <i>Rnf19b</i>         | 3.1       |
| NM_173786          | <i>Apol9a</i>         | 3.1       |
| NM_173786          | <i>Apol9a</i>         | 3.1       |
| NM_013606          | <i>Mx2</i>            | 3.0       |
| NM_001114679       | <i>9930111J21Rik1</i> | 3.0       |
| NM_001159417       | <i>Irf9</i>           | 3.0       |
| NM_016850          | <i>Irf7</i>           | 2.9       |
| NM_030684          | <i>Trim34a</i>        | 2.9       |
| NR_033332          | <i>Gm12216</i>        | 2.8       |
| AK135804           | <i>Gm10839</i>        | 2.7       |
| NM_023279          | <i>Tubb3</i>          | 2.7       |
| NM_027835          | <i>Ifih1</i>          | 2.7       |



|                    |                      |     |
|--------------------|----------------------|-----|
| NM_021394          | <i>Zbp1</i>          | 2.7 |
| NM_172729          | <i>Nod1</i>          | 2.6 |
| NM_008358          | <i>Il15ra</i>        | 2.6 |
| NM_010156          | <i>Samd9l</i>        | 2.6 |
| NM_023738          | <i>Uba7</i>          | 2.6 |
| NM_013640          | <i>Psmb10</i>        | 2.5 |
| NM_001005858       | <i>I830012O16Rik</i> | 2.5 |
| NM_145391          | <i>Tapbp1</i>        | 2.5 |
| NM_010156          | <i>Samd9l</i>        | 2.4 |
| NM_010821          | <i>Mpeg1</i>         | 2.4 |
| ENSMUST00000030584 | <i>Rnf19b</i>        | 2.4 |
| NM_029084          | <i>Slamf8</i>        | 2.4 |
| AK090152           | <i>Dtx3l</i>         | 2.3 |
| NM_025992          | <i>Herc6</i>         | 2.2 |
| NM_025992          | <i>Herc6</i>         | 2.2 |
| NM_198095          | <i>Bst2</i>          | 2.2 |
| NM_172893          | <i>Parp12</i>        | 2.1 |
| NM_001013371       | <i>Dtx3l</i>         | 2.1 |
| NM_010681          | <i>Lama4</i>         | 2.1 |
| ENSMUST00000102642 | <i>Ube2l6</i>        | 2.1 |
| NM_153564          | <i>Gbp5</i>          | 2.0 |
| NM_009396          | <i>Tnfaip2</i>       | 2.0 |
| NM_145227          | <i>Oas2</i>          | 2.0 |
| NM_172689          | <i>Ddx58</i>         | 2.0 |
| NM_172689          | <i>Ddx58</i>         | 2.0 |
| NM_009396          | <i>Tnfaip2</i>       | 2.0 |
| NM_175449          | <i>Fam26f</i>        | 1.9 |
| ENSMUST00000093902 | <i>Rnf213</i>        | 1.9 |
| NM_008223          | <i>Serpind1</i>      | 1.9 |
| NM_199252          | <i>Unc93a</i>        | 1.8 |
| AK017289           | <i>5430410E06Rik</i> | 1.8 |
| NM_001141949       | <i>Nmi</i>           | 1.8 |
| NM_027320          | <i>Ifi35</i>         | 1.8 |
| NM_001025313       | <i>Tapbp</i>         | 1.8 |
| NM_009808          | <i>Casp12</i>        | 1.7 |
| NM_011486          | <i>Stat3</i>         | 1.7 |
| NM_001159393       | <i>Irf1</i>          | 1.7 |
| NM_011832          | <i>Insrr</i>         | 1.6 |
| NM_146125          | <i>Itpka</i>         | 1.6 |
| NM_008357          | <i>Il15</i>          | 1.6 |
| NR_045032          | <i>Gdap10</i>        | 1.6 |
| NM_019949          | <i>Ube2l6</i>        | 1.6 |
| NM_001005748       | <i>Phactr1</i>       | 1.6 |
| NM_001005748       | <i>Phactr1</i>       | 1.6 |
| NM_198004          | <i>5133401N09Rik</i> | 1.6 |
| NM_001177351       | <i>AW112010</i>      | 1.5 |

|                    |                      |     |
|--------------------|----------------------|-----|
| NM_213659          | <i>Stat3</i>         | 1.5 |
| NM_126166          | <i>Tlr3</i>          | 1.5 |
| NM_145211          | <i>Oas1a</i>         | 1.5 |
| NM_009546          | <i>Trim25</i>        | 1.5 |
| NM_027835          | <i>Ifih1</i>         | 1.5 |
| ENSMUST00000170226 | <i>Plec</i>          | 1.5 |
| NM_183162          | <i>BC006779</i>      | 1.5 |
| ENSMUST00000112869 | <i>Prune2</i>        | 1.5 |
| NM_001005748       | <i>Phactr1</i>       | 1.4 |
| NM_011163          | <i>Eif2ak2</i>       | 1.4 |
| NM_010531          | <i>Il18bp</i>        | 1.4 |
| NM_018851          | <i>Samhd1</i>        | 1.4 |
| NM_194346          | <i>Rnf31</i>         | 1.4 |
| NM_194346          | <i>Rnf31</i>         | 1.3 |
| NM_026913          | <i>Mitd1</i>         | 1.3 |
| NM_183426          | <i>Sbno2</i>         | 1.3 |
| NM_001033196       | <i>Znfx1</i>         | 1.3 |
| NM_011190          | <i>Psme2</i>         | 1.3 |
| NM_001139520       | <i>Samhd1</i>        | 1.3 |
| NM_009895          | <i>Cish</i>          | 1.3 |
| NM_028261          | <i>Tmem173</i>       | 1.3 |
| NM_001025208       | <i>LOC547349</i>     | 1.3 |
| NM_010398          | <i>H2-T23</i>        | 1.3 |
| NM_008230          | <i>Hdc</i>           | 1.3 |
| NM_011710          | <i>Wars</i>          | 1.3 |
| NM_011190          | <i>Psme2</i>         | 1.3 |
| NM_007707          | <i>Socs3</i>         | 1.3 |
| NM_001014996       | <i>Cenpj</i>         | 1.3 |
| NM_009834          | <i>Ccm4l</i>         | 1.3 |
| NM_008744          | <i>Ntn1</i>          | 1.3 |
| ENSMUST00000100186 | <i>LOC100503847</i>  | 1.2 |
| NM_001199967       | <i>Gm11127</i>       | 1.2 |
| NM_001243760       | <i>Ciita</i>         | 1.2 |
| NM_001038587       | <i>Adar</i>          | 1.2 |
| NM_028035          | <i>Snx10</i>         | 1.2 |
| ENSMUST00000054384 | <i>Trim56</i>        | 1.2 |
| NM_001141981       | <i>Rbm43</i>         | 1.2 |
| NM_001164314       | <i>Wars</i>          | 1.2 |
| NM_028807          | <i>1200009I06Rik</i> | 1.2 |
| NM_028035          | <i>Snx10</i>         | 1.2 |
| NM_030743          | <i>Rnf114</i>        | 1.1 |
| NM_201373          | <i>Trim56</i>        | 1.1 |
| NM_030711          | <i>Erap1</i>         | 1.1 |
| NM_001243916       | <i>Trim34b</i>       | 1.1 |
| NM_172767          | <i>Vwa5a</i>         | 1.1 |
| NM_172767          | <i>Vwa5a</i>         | 1.1 |

|              |                      |     |
|--------------|----------------------|-----|
| NM_001001892 | <i>H2-K1</i>         | 1.1 |
| NM_145153    | <i>Oas1f</i>         | 1.1 |
| NM_011189    | <i>Psme1</i>         | 1.1 |
| NM_011390    | <i>Slc12a7</i>       | 1.1 |
| NM_010392    | <i>H2-Q2</i>         | 1.1 |
| NM_144830    | <i>Tmem106a</i>      | 1.1 |
| NM_011150    | <i>Lgals3bp</i>      | 1.1 |
| NM_001033136 | <i>Fam82a2</i>       | 1.0 |
| NM_181402    | <i>Parp11</i>        | 1.0 |
| NM_001081032 | <i>Gm8909</i>        | 1.0 |
| NM_010393    | <i>H2-Q5</i>         | 1.0 |
| NR_038025    | <i>4933412E12Rik</i> | 1.0 |

Genes are ordered according to their induction (log 2-transformed) by IFN- $\gamma$  in WT cells (column: WT-g/WT-0). Genes that appear more than once have different probe set IDs for each listing. Data are extracted from the Table S4.

**Table S4. Microarray Evaluation Showing the Effect of S727A Mutation and Cdk8 Silencing on Expression of IFN- $\gamma$ -Induced Genes**

| Probe set ID  | Genbank AC         | Gene symbol          | Gene name                                        | WT-siCtrl-g/WT-siCtrl-0 | SA-siCtrl-g/SA-siCtrl-0 | SA-siCtrl-g/WT-siCtrl-g | WT-siCdk8-g/WT-siCtrl-g | SA-siCdk8-g/SA-siCtrl-g | WT-siCdk8-0/WT-siCtrl-0 | SA-siCdk8-0/SA-siCtrl-0 | p-value: WT-siCtrl-g/WT-siCtrl-0 | p-value: SA-siCtrl-g/WT-siCtrl-g |
|---------------|--------------------|----------------------|--------------------------------------------------|-------------------------|-------------------------|-------------------------|-------------------------|-------------------------|-------------------------|-------------------------|----------------------------------|----------------------------------|
| A_55_P1981461 | AK017289           | <i>5430410E06Rik</i> | RIKEN cDNA 5430410E06 gene                       | 1.8                     | 1.7                     | 0.8                     | 0.0                     | -0.1                    | 0.0                     | 0.3                     | 0.00                             | 0.00                             |
| A_66_P101942  | AK019325           | <i>Gm9706</i>        | predicted gene 9706                              | 3.4                     | 3.9                     | 1.3                     | -0.2                    | -0.1                    | -0.1                    | -0.4                    | 0.00                             | 0.01                             |
| A_55_P2276224 | AK034303           | <i>9330175E14Rik</i> | RIKEN cDNA 9330175E14 gene                       | 3.8                     | 2.7                     | -0.3                    | 0.0                     | -0.2                    | -0.1                    | -0.4                    | 0.00                             | 0.45                             |
| A_55_P2470474 | AK087205           | <i>9530082P21Rik</i> | RIKEN cDNA 9530082P21 gene                       | 1.7                     | 2.0                     | 1.1                     | -0.2                    | 0.0                     | -0.3                    | -0.3                    | 0.00                             | 0.00                             |
| A_66_P106060  | AK090152           | <i>Dtx3l</i>         | deltex 3-like (Drosophila)                       | 2.3                     | 1.8                     | 0.4                     | -0.2                    | -0.1                    | 0.0                     | -0.6                    | 0.00                             | 0.52                             |
| A_55_P2079535 | AK135804           | <i>Gm10839</i>       | predicted gene 10839                             | 2.7                     | 3.0                     | 0.3                     | 0.3                     | -0.1                    | 0.1                     | 0.2                     | 0.00                             | 0.48                             |
| A_55_P2016459 | AK156907           | <i>Cxcl10</i>        | chemokine (C-X-C motif) ligand 10                | 1.5                     | 3.2                     | 2.1                     | -0.2                    | -0.8                    | 0.0                     | 0.1                     | 0.00                             | 0.00                             |
| A_55_P2066578 | BC010546           | <i>Ifi204</i>        | interferon activated gene 204                    | 3.5                     | 2.7                     | 2.6                     | 0.1                     | 0.0                     | 0.9                     | 0.0                     | 0.00                             | 0.00                             |
| A_66_P124724  | ENSMUST00000030584 | <i>Rnf19b</i>        | ring finger protein 19B                          | 2.4                     | 1.9                     | 0.2                     | 0.0                     | -0.4                    | 0.1                     | 0.1                     | 0.00                             | 0.48                             |
| A_55_P2358679 | ENSMUST00000054384 | <i>Trim56</i>        | tripartite motif-containing 56                   | 1.2                     | 1.1                     | -0.2                    | -0.2                    | -0.2                    | 0.0                     | -0.2                    | 0.00                             | 0.28                             |
| A_52_P480044  | ENSMUST00000073997 | <i>BC023105</i>      | cDNA sequence BC023105                           | 5.2                     | 4.7                     | -0.6                    | -1.1                    | -0.9                    | -0.1                    | 0.2                     | 0.00                             | 0.08                             |
| A_51_P159503  | ENSMUST00000093902 | <i>Rnf213</i>        | ring finger protein 213                          | 1.9                     | 1.8                     | 0.1                     | -0.4                    | -0.1                    | 0.1                     | 0.1                     | 0.00                             | 0.88                             |
| A_55_P2035003 | ENSMUST00000100186 | <i>LOC100503847</i>  | hypothetical LOC100503847                        | 1.2                     | 1.3                     | -0.3                    | 0.0                     | 0.4                     | -0.1                    | 0.0                     | 0.02                             | 0.61                             |
| A_55_P2141943 | ENSMUST00000102642 | <i>Ube2l6</i>        | ubiquitin-conjugating enzyme E2L 6               | 2.1                     | 2.4                     | -0.8                    | -0.3                    | -0.1                    | -0.5                    | -0.1                    | 0.00                             | 0.08                             |
| A_55_P2025612 | ENSMUST00000104958 | <i>Psme2</i>         | proteasome (prosome, macropain) 28 subunit, beta | 1.8                     | 0.6                     | 2.3                     | -0.1                    | 0.1                     | 0.0                     | -0.1                    | 0.00                             | 0.00                             |
| A_55_P2042096 | ENSMUST00000112869 | <i>Prune2</i>        | prune homolog 2                                  | 1.5                     | 2.2                     | 0.8                     | -0.7                    | -0.5                    | -0.1                    | 0.2                     | 0.01                             | 0.06                             |

|               |                    |                      |                                                                                          |     |     |      |      |      |      |      |      |      |
|---------------|--------------------|----------------------|------------------------------------------------------------------------------------------|-----|-----|------|------|------|------|------|------|------|
|               |                    |                      | (Drosophila)                                                                             |     |     |      |      |      |      |      |      |      |
| A_55_P2038983 | ENSMUST00000114230 | <i>Psmb9</i>         | proteasome (prosome, macropain) subunit, beta type 9 (large multifunctional peptidase 2) | 1.9 | 0.8 | -1.0 | -0.4 | -0.1 | 0.1  | -0.2 | 0.00 | 0.00 |
| A_55_P2006983 | ENSMUST00000170226 | <i>Plec</i>          | plectin                                                                                  | 1.5 | 1.4 | 0.0  | 0.0  | 0.1  | 0.2  | 0.2  | 0.00 | 0.98 |
| A_55_P2049647 | NM_001001892       | <i>H2-K1</i>         | histocompatibility 2, K1, K region                                                       | 1.1 | 0.6 | 0.9  | -0.2 | -0.2 | 0.1  | 0.0  | 0.00 | 0.00 |
| A_55_P2137049 | NM_001004174       | <i>AA467197</i>      | expressed sequence AA467197                                                              | 3.6 | 3.8 | 4.0  | -1.1 | -0.5 | 0.3  | 0.5  | 0.00 | 0.00 |
| A_52_P605517  | NM_001005748       | <i>Phactr1</i>       | phosphatase and actin regulator 1                                                        | 1.6 | 0.3 | -0.4 | -0.1 | -0.3 | -0.1 | -0.9 | 0.00 | 0.29 |
| A_51_P182572  | NM_001005748       | <i>Phactr1</i>       | phosphatase and actin regulator 1                                                        | 1.6 | 0.3 | -0.5 | -0.3 | -0.3 | -0.2 | -0.9 | 0.00 | 0.17 |
| A_55_P2068233 | NM_001005748       | <i>Phactr1</i>       | phosphatase and actin regulator 1                                                        | 1.4 | 0.4 | -0.4 | -0.1 | -0.3 | -0.2 | -0.8 | 0.00 | 0.36 |
| A_66_P117933  | NM_001005858       | <i>I830012O16Rik</i> | RIKEN cDNA I830012O16 gene                                                               | 3.7 | 3.5 | 0.6  | -0.8 | -0.5 | -0.6 | -0.7 | 0.00 | 0.36 |
| A_55_P1972872 | NM_001005858       | <i>I830012O16Rik</i> | RIKEN cDNA I830012O16 gene                                                               | 2.5 | 2.8 | 0.4  | -1.0 | -0.3 | -0.5 | -0.2 | 0.01 | 0.72 |
| A_55_P2174541 | NM_001013371       | <i>Dtx3l</i>         | deltex 3-like (Drosophila)                                                               | 4.1 | 3.6 | 0.6  | -0.2 | -0.3 | 0.4  | 0.1  | 0.00 | 0.05 |
| A_55_P2059154 | NM_001013371       | <i>Dtx3l</i>         | deltex 3-like (Drosophila)                                                               | 2.1 | 2.4 | 0.5  | -0.2 | -0.2 | 0.0  | 0.2  | 0.00 | 0.06 |
| A_55_P2112787 | NM_001013828       | <i>Iigp1b</i>        | interferon inducible GTPase 1B                                                           | 1.6 | 0.8 | -1.0 | -0.7 | -0.5 | -0.1 | 0.1  | 0.00 | 0.01 |
| A_51_P174434  | NM_001014996       | <i>Cenpj</i>         | centromere protein J                                                                     | 1.3 | 1.2 | -0.3 | -0.2 | 0.0  | 0.1  | 0.4  | 0.00 | 0.37 |
| A_55_P1966660 | NM_001025208       | <i>LOC547349</i>     | similar to MHC class I antigen precursor                                                 | 1.3 | 0.9 | 0.8  | -0.3 | -0.4 | -0.4 | -0.3 | 0.00 | 0.00 |
| A_55_P2149763 | NM_001025313       | <i>Tapbp</i>         | TAP binding protein                                                                      | 1.8 | 1.0 | 0.9  | 0.0  | 0.0  | 0.2  | 0.0  | 0.00 | 0.00 |
| A_51_P233027  | NM_001033136       | <i>Fam82a2</i>       | family with sequence similarity 82, member A2                                            | 1.0 | 0.7 | -0.2 | 0.0  | 0.0  | 0.3  | 0.1  | 0.01 | 0.72 |
| A_55_P2076757 | NM_001033196       | <i>Znfx1</i>         | zinc finger, NFX1-type containing 1                                                      | 1.3 | 1.4 | -0.4 | -0.1 | -0.1 | 0.0  | -0.1 | 0.00 | 0.11 |
| A_66_P113043  | NM_001033207       | <i>Nlrc5</i>         | NLR family, CARD domain containing 5                                                     | 6.8 | 5.3 | 0.1  | -0.3 | -0.4 | 0.2  | 0.0  | 0.00 | 0.88 |

|               |              |                       |                                                |     |     |      |      |      |      |      |      |      |
|---------------|--------------|-----------------------|------------------------------------------------|-----|-----|------|------|------|------|------|------|------|
| A_55_P2016034 | NM_001033207 | <i>Nlrc5</i>          | NLR family, CARD domain containing 5           | 1.0 | 1.9 | 1.2  | 0.0  | 0.0  | 0.2  | -0.3 | 0.00 | 0.00 |
| A_55_P1962918 | NM_001033450 | <i>Mnda</i>           | myeloid cell nuclear differentiation antigen   | 3.7 | 2.7 | 2.3  | 0.0  | -0.1 | 0.3  | 0.2  | 0.00 | 0.00 |
| A_55_P2133195 | NM_001033767 | <i>Gm4951</i>         | predicted gene 4951                            | 8.7 | 7.3 | -1.1 | -1.1 | -1.3 | -0.2 | -0.3 | 0.00 | 0.00 |
| A_55_P2073024 | NM_001034859 | <i>Gm4841</i>         | predicted gene 4841                            | 9.8 | 6.8 | -3.0 | -1.2 | -2.0 | -0.1 | 0.0  | 0.00 | 0.00 |
| A_55_P1966838 | NM_001037713 | <i>Xaf1</i>           | XIAP associated factor 1                       | 4.9 | 5.1 | -1.1 | -0.3 | -0.2 | 0.0  | -0.2 | 0.00 | 0.01 |
| A_55_P1966833 | NM_001037713 | <i>Xaf1</i>           | XIAP associated factor 1                       | 1.9 | 0.9 | -1.3 | -0.3 | 0.1  | 0.2  | 0.2  | 0.00 | 0.00 |
| A_55_P1969078 | NM_001038587 | <i>Adar</i>           | adenosine deaminase, RNA-specific              | 1.2 | 1.4 | -0.1 | -0.2 | -0.3 | -0.1 | 0.0  | 0.01 | 0.91 |
| A_51_P514712  | NM_001039530 | <i>Parp14</i>         | poly (ADP-ribose) polymerase family, member 14 | 5.4 | 4.7 | 0.2  | -0.5 | -0.5 | 0.0  | 0.0  | 0.00 | 0.68 |
| A_55_P1978521 | NM_001039646 | <i>Gbp10</i>          | guanylate-binding protein 10                   | 1.4 | 0.5 | -1.3 | -0.6 | -0.1 | 0.0  | 0.1  | 0.00 | 0.00 |
| A_55_P2042813 | NM_001039647 | <i>Gbp11</i>          | guanylate binding protein 11                   | 6.3 | 2.7 | -2.9 | -0.3 | -0.2 | 0.0  | -0.6 | 0.00 | 0.00 |
| A_55_P1966731 | NM_001045481 | <i>Ifi203</i>         | interferon activated gene 203                  | 4.2 | 6.0 | 2.6  | 0.4  | -0.3 | 0.1  | 0.1  | 0.00 | 0.00 |
| A_55_P1988202 | NM_001045481 | <i>Ifi203</i>         | interferon activated gene 203                  | 2.9 | 4.9 | 2.5  | 0.4  | 0.0  | 0.0  | 0.2  | 0.00 | 0.00 |
| A_52_P494730  | NM_001045540 | <i>Gm12185</i>        | predicted gene 12185                           | 3.5 | 1.4 | -1.2 | -1.0 | -0.2 | 0.1  | 0.0  | 0.00 | 0.00 |
| A_55_P1956160 | NM_001081032 | <i>Gm8909</i>         | predicted gene 8909                            | 1.0 | 0.8 | 0.6  | -0.2 | -0.3 | -0.3 | -0.3 | 0.03 | 0.08 |
| A_55_P2008016 | NM_001081083 | <i>Armc3</i>          | armadillo repeat containing 3                  | 2.2 | 0.7 | -1.6 | 0.1  | 0.0  | 0.1  | -0.1 | 0.00 | 0.00 |
| A_55_P1959064 | NM_001083925 | <i>Oas1b</i>          | 2'-5' oligoadenylate synthetase 1B             | 1.1 | 0.1 | -1.1 | -0.1 | 0.0  | 0.0  | -0.1 | 0.00 | 0.00 |
| A_66_P125389  | NM_001101475 | <i>F830016B08Rik</i>  | RIKEN cDNA F830016B08 gene                     | 6.5 | 4.5 | -2.0 | -1.2 | -1.5 | -0.2 | -0.2 | 0.00 | 0.00 |
| A_55_P2015405 | NM_001114679 | <i>9930111J21Rik1</i> | RIKEN cDNA 9930111J21 gene 1                   | 3.0 | 1.2 | -0.3 | -0.6 | -0.2 | 0.1  | 0.0  | 0.00 | 0.37 |
| A_55_P2057936 | NM_001135115 | <i>Gm12250</i>        | predicted gene 12250                           | 5.2 | 4.1 | -1.1 | -0.5 | -0.6 | -0.1 | -0.1 | 0.00 | 0.01 |
| A_55_P1994042 | NM_001139519 | <i>Zbp1</i>           | Z-DNA binding protein 1                        | 2.7 | 4.2 | 1.6  | 0.1  | -0.4 | 0.0  | 0.1  | 0.00 | 0.00 |

|               |              |                      |                                                              |     |     |      |      |      |      |      |      |      |
|---------------|--------------|----------------------|--------------------------------------------------------------|-----|-----|------|------|------|------|------|------|------|
| A_55_P2019699 | NM_001139520 | <i>Samhd1</i>        | SAM domain and HD domain, 1                                  | 1.3 | 1.5 | 0.5  | -0.4 | -0.3 | -0.1 | -0.1 | 0.00 | 0.16 |
| A_55_P2034705 | NM_001141949 | <i>Nmi</i>           | N-myc (and STAT) interactor                                  | 1.8 | 1.5 | 0.3  | -0.1 | -0.1 | 0.2  | 0.0  | 0.00 | 0.23 |
| A_55_P2017491 | NM_001141981 | <i>Rbm43</i>         | RNA binding motif protein 43                                 | 1.2 | 0.7 | -0.1 | 0.1  | 0.2  | 0.2  | 0.0  | 0.00 | 0.79 |
| A_55_P2062246 | NM_001145164 | <i>Tgtp2</i>         | T-cell specific GTPase 2                                     | 9.5 | 9.2 | -0.6 | -0.8 | -0.8 | 1.1  | 0.0  | 0.00 | 0.07 |
| A_55_P1989225 | NM_001145164 | <i>Tgtp2</i>         | T-cell specific GTPase 2                                     | 5.5 | 4.9 | -0.6 | -1.3 | -0.5 | -0.1 | 0.0  | 0.00 | 0.06 |
| A_55_P2039061 | NM_001146007 | <i>9230105E10Rik</i> | RIKEN cDNA 9230105E10 gene                                   | 1.7 | 0.8 | -1.6 | 0.1  | 0.2  | 0.1  | -0.1 | 0.00 | 0.00 |
| A_55_P2163857 | NM_001146007 | <i>9230105E10Rik</i> | RIKEN cDNA 9230105E10 gene                                   | 1.7 | 0.8 | -1.3 | -0.2 | 0.1  | 0.1  | 0.1  | 0.00 | 0.00 |
| A_55_P2064652 | NM_001146007 | <i>9230105E10Rik</i> | RIKEN cDNA 9230105E10 gene                                   | 1.5 | 0.5 | -1.3 | 0.5  | 0.1  | 0.0  | -0.2 | 0.01 | 0.00 |
| A_55_P1990633 | NM_001146275 | <i>ligp1</i>         | interferon inducible GTPase 1                                | 7.7 | 7.3 | -0.7 | -1.3 | -1.1 | 0.8  | 0.2  | 0.00 | 0.57 |
| A_55_P2410304 | NM_001146275 | <i>ligp1</i>         | interferon inducible GTPase 1                                | 4.5 | 4.0 | -0.7 | -1.2 | -1.2 | -0.2 | -0.4 | 0.00 | 0.06 |
| A_55_P2000067 | NM_001159393 | <i>Irf1</i>          | interferon regulatory factor 1                               | 1.7 | 1.7 | -0.1 | -0.3 | -0.3 | -0.1 | 0.1  | 0.00 | 0.87 |
| A_55_P2114938 | NM_001159417 | <i>Irf9</i>          | interferon regulatory factor 9                               | 3.0 | 2.1 | -0.1 | -0.3 | -0.4 | -0.2 | -0.5 | 0.00 | 0.81 |
| A_55_P2130970 | NM_001163576 | <i>Parp10</i>        | poly (ADP-ribose) polymerase family, member 10               | 3.8 | 2.9 | 0.0  | -0.2 | -0.2 | 0.7  | 0.1  | 0.00 | 0.99 |
| A_66_P104314  | NM_001163621 | <i>Apol6</i>         | apolipoprotein L 6                                           | 3.2 | 3.3 | 0.6  | 0.0  | 0.2  | 0.4  | 0.2  | 0.00 | 0.19 |
| A_55_P1972275 | NM_001164314 | <i>Wars</i>          | tryptophanyl-tRNA synthetase                                 | 1.2 | 1.1 | -0.6 | -0.1 | 0.0  | 0.2  | 0.2  | 0.01 | 0.09 |
| A_55_P2104975 | NM_001168294 | <i>Serpina3f</i>     | serine (or cysteine) peptidase inhibitor, clade A, member 3F | 6.2 | 4.7 | -1.1 | -1.1 | -1.5 | -0.1 | -0.3 | 0.00 | 0.01 |
| A_55_P2142226 | NM_001168294 | <i>Serpina3f</i>     | serine (or cysteine) peptidase inhibitor, clade A, member 3F | 5.0 | 3.1 | -0.5 | -1.2 | -1.3 | -0.2 | -0.7 | 0.00 | 0.16 |
| A_66_P110633  | NM_001168660 | <i>Apol9b</i>        | apolipoprotein L 9b                                          | 3.5 | 4.1 | 0.6  | 0.0  | 0.0  | 0.0  | 0.0  | 0.00 | 0.05 |
| A_52_P1020860 | NM_001177351 | <i>AW112010</i>      | expressed sequence AW112010                                  | 1.5 | 1.2 | -0.3 | 0.1  | 0.0  | 0.4  | 0.2  | 0.04 | 0.66 |
| A_51_P175567  | NM_001190466 | <i>Dact1</i>         | dapper homolog 1,                                            | 1.3 | 1.6 | -3.6 | -0.5 | 0.0  | 0.2  | 0.3  | 0.00 | 0.00 |

|               |              |                  |                                                              |     |     |      |      |      |      |      |      |      |
|---------------|--------------|------------------|--------------------------------------------------------------|-----|-----|------|------|------|------|------|------|------|
|               |              |                  | antagonist of beta-catenin (xenopus)                         |     |     |      |      |      |      |      |      |      |
| A_55_P2177899 | NM_001190466 | <i>Dact1</i>     | dapper homolog 1, antagonist of beta-catenin (xenopus)       | 1.3 | 1.3 | -3.2 | -0.4 | -0.1 | 0.3  | 0.3  | 0.00 | 0.00 |
| A_55_P1966774 | NM_001199940 | <i>Serpina3i</i> | serine (or cysteine) peptidase inhibitor, clade A, member 3I | 3.5 | 1.4 | -1.0 | -0.9 | -1.0 | -0.8 | -1.4 | 0.01 | 0.37 |
| A_55_P2142232 | NM_001199940 | <i>Serpina3i</i> | serine (or cysteine) peptidase inhibitor, clade A, member 3I | 2.3 | 1.5 | -1.2 | -0.8 | -0.7 | -0.4 | 0.0  | 0.00 | 0.00 |
| A_55_P2125049 | NM_001199967 | <i>Gm11127</i>   | predicted gene 11127                                         | 1.2 | 0.7 | 0.9  | -0.3 | -0.3 | -0.2 | -0.1 | 0.00 | 0.00 |
| A_55_P2081105 | NM_001204910 | <i>AI607873</i>  | expressed sequence AI607873                                  | 2.8 | 3.7 | 2.8  | 0.8  | 0.2  | 0.5  | 0.6  | 0.00 | 0.00 |
| A_55_P2179074 | NM_001243760 | <i>Ciita</i>     | class II transactivator                                      | 1.2 | 1.3 | 0.1  | -0.2 | -0.3 | -0.2 | 0.0  | 0.02 | 0.90 |
| A_55_P1973229 | NM_001243916 | <i>Trim34b</i>   | tripartite motif-containing 34B                              | 1.1 | 0.7 | -0.3 | -0.2 | 0.1  | 0.2  | -0.2 | 0.00 | 0.31 |
| A_55_P2103837 | NM_001256005 | <i>Gbp4</i>      | guanylate binding protein 4                                  | 4.6 | 1.4 | -3.2 | -0.6 | -0.6 | 0.0  | -0.1 | 0.00 | 0.00 |
| A_55_P2091461 | NM_007609    | <i>Casp4</i>     | caspase 4, apoptosis-related cysteine peptidase              | 3.1 | 2.0 | 3.5  | 0.3  | -0.1 | 0.4  | 0.2  | 0.00 | 0.00 |
| A_55_P1984168 | NM_007609    | <i>Casp4</i>     | caspase 4, apoptosis-related cysteine peptidase              | 2.9 | 2.0 | 3.5  | 0.3  | 0.0  | 0.3  | 0.3  | 0.00 | 0.00 |
| A_51_P474459  | NM_007707    | <i>Socs3</i>     | suppressor of cytokine signaling 3                           | 1.3 | 1.4 | 0.6  | -0.2 | -0.4 | 0.0  | -0.2 | 0.00 | 0.01 |
| A_55_P2091676 | NM_007987    | <i>Fas</i>       | Fas (TNF receptor superfamily member 6)                      | 1.4 | 1.8 | -1.7 | 0.3  | -0.8 | 0.3  | -0.6 | 0.01 | 0.00 |
| A_51_P468140  | NM_008223    | <i>Serpind1</i>  | serine (or cysteine) peptidase inhibitor, clade D, member 1  | 1.9 | 1.8 | 0.0  | -0.5 | -0.1 | 0.0  | 0.0  | 0.00 | 0.95 |
| A_51_P254656  | NM_008230    | <i>Hdc</i>       | histidine decarboxylase                                      | 1.3 | 0.8 | -0.5 | -0.3 | 0.2  | 0.0  | 0.2  | 0.00 | 0.03 |
| A_52_P354823  | NM_008320    | <i>Irf8</i>      | interferon regulatory factor 8                               | 4.6 | 2.7 | -2.1 | -0.9 | -1.3 | -0.1 | 0.0  | 0.00 | 0.00 |
| A_55_P1981479 | NM_008326    | <i>Irgm1</i>     | immunity-related GTPase family M member 1                    | 5.8 | 4.5 | -0.4 | -0.4 | -0.2 | 0.3  | -0.1 | 0.00 | 0.13 |
| A_51_P262171  | NM_008326    | <i>Irgm1</i>     | immunity-related                                             | 5.2 | 4.3 | -0.1 | -0.3 | -0.3 | 0.2  | -0.2 | 0.00 | 0.70 |



|               |           |                  |                                                              |     |      |      |      |      |      |      |      |      |
|---------------|-----------|------------------|--------------------------------------------------------------|-----|------|------|------|------|------|------|------|------|
|               |           |                  | GTPase family M member 1                                     |     |      |      |      |      |      |      |      |      |
| A_55_P1975560 | NM_008329 | <i>Ifi204</i>    | interferon activated gene 204                                | 4.0 | 3.1  | 2.8  | 0.4  | 0.1  | 1.0  | 0.2  | 0.00 | 0.00 |
| A_55_P1998416 | NM_008330 | <i>Ifi47</i>     | interferon gamma inducible protein 47                        | 6.1 | 5.9  | -0.3 | 0.0  | 0.0  | 0.6  | 0.2  | 0.00 | 0.68 |
| A_51_P327751  | NM_008331 | <i>Ifit1</i>     | interferon-induced protein with tetratricopeptide repeats 1  | 4.7 | 4.4  | 0.5  | -0.5 | -0.6 | -0.3 | -0.5 | 0.00 | 0.47 |
| A_52_P15461   | NM_008357 | <i>Il15</i>      | interleukin 15                                               | 1.6 | 1.1  | -0.4 | 0.0  | 0.4  | -0.1 | 0.2  | 0.00 | 0.10 |
| A_55_P2041738 | NM_008358 | <i>Il15ra</i>    | interleukin 15 receptor, alpha chain                         | 2.6 | 2.4  | -0.2 | -0.7 | -0.7 | -0.2 | -0.3 | 0.00 | 0.59 |
| A_51_P271503  | NM_008362 | <i>Il1r1</i>     | interleukin 1 receptor, type I                               | 1.0 | 0.7  | -1.4 | 0.2  | -0.7 | 0.3  | -0.2 | 0.01 | 0.00 |
| A_55_P2096422 | NM_008381 | <i>Inhbb</i>     | inhibin beta-B                                               | 1.4 | -0.2 | 1.9  | 0.0  | 0.3  | 0.2  | 0.3  | 0.00 | 0.00 |
| A_55_P2000062 | NM_008390 | <i>Irf1</i>      | interferon regulatory factor 1                               | 4.3 | 3.8  | 0.0  | -0.1 | -0.1 | 0.1  | 0.1  | 0.00 | 0.95 |
| A_51_P461665  | NM_008599 | <i>Cxcl9</i>     | chemokine (C-X-C motif) ligand 9                             | 1.0 | 3.1  | 2.2  | 0.3  | -0.7 | -0.1 | 0.1  | 0.00 | 0.00 |
| A_55_P2162935 | NM_008744 | <i>Ntn1</i>      | netrin 1                                                     | 1.3 | 0.6  | 0.0  | -0.1 | -0.2 | 0.0  | 0.2  | 0.00 | 0.96 |
| A_51_P326191  | NM_009251 | <i>Serpina3g</i> | serine (or cysteine) peptidase inhibitor, clade A, member 3G | 5.3 | 4.0  | 1.2  | -0.9 | -1.1 | -0.5 | -1.1 | 0.00 | 0.00 |
| A_55_P2134246 | NM_009256 | <i>Serpina9</i>  | serine (or cysteine) peptidase inhibitor, clade B, member 9  | 1.1 | 0.6  | 2.1  | -0.2 | -0.2 | -0.2 | -0.2 | 0.01 | 0.00 |
| A_55_P1962344 | NM_009277 | <i>Trim21</i>    | tripartite motif-containing 21                               | 4.2 | 3.8  | -1.4 | -0.3 | -0.2 | 0.3  | 0.1  | 0.00 | 0.00 |
| A_55_P1955906 | NM_009283 | <i>Stat1</i>     | signal transducer and activator of transcription 1           | 3.3 | 2.9  | -0.4 | -0.5 | -0.4 | 0.0  | 0.2  | 0.00 | 0.33 |
| A_51_P195958  | NM_009344 | <i>Phlda1</i>    | pleckstrin homology-like domain, family A, member 1          | 1.3 | 0.1  | 1.9  | -0.4 | -0.1 | -0.1 | 0.1  | 0.01 | 0.00 |
| A_55_P2098697 | NM_009396 | <i>Tnfaip2</i>   | tumor necrosis factor, alpha-induced protein 2               | 2.0 | 0.7  | -0.6 | 0.1  | -0.2 | 0.3  | 0.2  | 0.00 | 0.02 |
| A_51_P364485  | NM_009396 | <i>Tnfaip2</i>   | tumor necrosis factor, alpha-                                | 2.0 | 0.7  | -0.6 | 0.1  | -0.2 | 0.3  | 0.2  | 0.00 | 0.02 |

|               |           |               |                                                             |     |     |      |      |      |      |      |      |      |
|---------------|-----------|---------------|-------------------------------------------------------------|-----|-----|------|------|------|------|------|------|------|
|               |           |               | induced protein 2                                           |     |     |      |      |      |      |      |      |      |
| A_55_P2098071 | NM_009546 | <i>Trim25</i> | tripartite motif-containing 25                              | 1.5 | 1.4 | -0.7 | -0.2 | -0.3 | -0.2 | -0.4 | 0.00 | 0.01 |
| A_55_P2078633 | NM_009780 | <i>C4b</i>    | complement component 4B (Childo blood group)                | 1.0 | 0.9 | 1.9  | 0.0  | 0.0  | 0.4  | -0.2 | 0.04 | 0.00 |
| A_55_P1983853 | NM_009808 | <i>Casp12</i> | caspase 12                                                  | 1.7 | 1.2 | 0.6  | 0.0  | -0.1 | 0.2  | -0.3 | 0.00 | 0.00 |
| A_55_P1968723 | NM_009834 | <i>Ccrn4l</i> | CCR4 carbon catabolite repression 4-like (S. cerevisiae)    | 1.3 | 1.2 | 0.8  | 0.1  | 0.0  | 0.1  | 0.4  | 0.00 | 0.01 |
| A_51_P470715  | NM_009895 | <i>Cish</i>   | cytokine inducible SH2-containing protein                   | 1.3 | 1.4 | 0.5  | -0.1 | -0.2 | 0.0  | -0.2 | 0.00 | 0.01 |
| A_51_P279606  | NM_009896 | <i>Socs1</i>  | suppressor of cytokine signaling 1                          | 3.6 | 2.8 | -1.0 | -0.2 | -0.2 | -0.1 | -0.2 | 0.00 | 0.00 |
| A_66_P121787  | NM_010156 | <i>Samd9l</i> | sterile alpha motif domain containing 9-like                | 2.6 | 2.7 | 0.1  | 0.0  | -0.1 | 0.2  | 0.0  | 0.00 | 0.85 |
| A_55_P2151601 | NM_010156 | <i>Samd9l</i> | sterile alpha motif domain containing 9-like                | 2.4 | 2.6 | 0.2  | 0.1  | 0.0  | 0.1  | 0.0  | 0.00 | 0.56 |
| A_65_P08971   | NM_010171 | <i>F3</i>     | coagulation factor III                                      | 1.3 | 1.0 | -2.1 | -0.2 | -0.1 | 0.2  | 0.0  | 0.01 | 0.00 |
| A_51_P203955  | NM_010260 | <i>Gbp2</i>   | guanylate binding protein 2                                 | 8.1 | 8.0 | -1.8 | -0.8 | -1.1 | -0.2 | -0.2 | 0.00 | 0.00 |
| A_51_P425048  | NM_010392 | <i>H2-Q2</i>  | histocompatibility 2, Q region locus 2                      | 1.2 | 0.6 | 1.0  | -0.3 | -0.1 | -0.1 | -0.1 | 0.00 | 0.00 |
| A_51_P219789  | NM_010392 | <i>H2-Q2</i>  | histocompatibility 2, Q region locus 2                      | 1.1 | 0.6 | 0.9  | -0.2 | 0.0  | 0.0  | 0.0  | 0.00 | 0.00 |
| A_51_P400752  | NM_010393 | <i>H2-Q5</i>  | histocompatibility 2, Q region locus 5                      | 1.0 | 0.6 | 0.8  | -0.3 | -0.1 | 0.0  | 0.0  | 0.00 | 0.00 |
| A_51_P237754  | NM_010398 | <i>H2-T23</i> | histocompatibility 2, T region locus 23                     | 1.3 | 0.7 | 0.8  | -0.3 | -0.3 | -0.2 | -0.1 | 0.00 | 0.00 |
| A_51_P359570  | NM_010501 | <i>Ifit3</i>  | interferon-induced protein with tetratricopeptide repeats 3 | 4.1 | 2.8 | 0.9  | -0.6 | -0.5 | -0.2 | -0.3 | 0.00 | 0.07 |
| A_52_P577384  | NM_010531 | <i>Il18bp</i> | interleukin 18 binding protein                              | 1.4 | 0.9 | 0.2  | 0.1  | 0.1  | 0.1  | 0.1  | 0.00 | 0.41 |
| A_51_P470079  | NM_010555 | <i>Il1r2</i>  | interleukin 1 receptor, type II                             | 1.1 | 0.1 | -1.3 | 0.8  | 0.1  | 0.4  | -0.1 | 0.00 | 0.00 |

|               |           |                 |                                                                                          |     |     |      |      |      |      |      |      |      |
|---------------|-----------|-----------------|------------------------------------------------------------------------------------------|-----|-----|------|------|------|------|------|------|------|
| A_51_P212420  | NM_010681 | <i>Lama4</i>    | laminin, alpha 4                                                                         | 2.1 | 1.2 | 0.4  | 0.6  | -0.2 | 1.3  | -0.2 | 0.00 | 0.43 |
| A_51_P345367  | NM_010724 | <i>Psmb8</i>    | proteasome (prosome, macropain) subunit, beta type 8 (large multifunctional peptidase 7) | 6.1 | 5.2 | -1.6 | -0.2 | -0.3 | 0.5  | 0.1  | 0.00 | 0.00 |
| A_51_P390538  | NM_010821 | <i>Mpeg1</i>    | macrophage expressed gene 1                                                              | 2.4 | 2.7 | 0.3  | -0.4 | -0.1 | 0.0  | 0.2  | 0.00 | 0.59 |
| A_52_P467726  | NM_010942 | <i>Nsg1</i>     | neuron specific gene family member 1                                                     | 1.2 | 0.8 | 2.1  | 0.0  | 0.1  | 0.3  | 0.1  | 0.00 | 0.00 |
| A_51_P319460  | NM_011019 | <i>Osmr</i>     | oncostatin M receptor                                                                    | 1.4 | 1.1 | 1.1  | 0.1  | -0.4 | 0.1  | -0.5 | 0.00 | 0.00 |
| A_51_P359636  | NM_011150 | <i>Lgals3bp</i> | lectin, galactoside-binding, soluble, 3 binding protein                                  | 1.1 | 1.1 | -0.1 | 0.5  | 0.4  | 0.6  | 0.4  | 0.02 | 0.81 |
| A_52_P559919  | NM_011163 | <i>Eif2ak2</i>  | eukaryotic translation initiation factor 2-alpha kinase 2                                | 1.4 | 1.4 | 0.3  | -0.3 | 0.0  | -0.2 | -0.4 | 0.00 | 0.31 |
| A_51_P101196  | NM_011189 | <i>Psme1</i>    | proteasome (prosome, macropain) 28 subunit, alpha                                        | 1.1 | 1.0 | -0.1 | -0.1 | -0.2 | 0.0  | 0.0  | 0.00 | 0.72 |
| A_55_P1996862 | NM_011190 | <i>Psme2</i>    | proteasome (prosome, macropain) 28 subunit, beta                                         | 1.3 | 1.0 | 0.2  | -0.1 | 0.0  | 0.2  | 0.1  | 0.00 | 0.58 |
| A_55_P2025611 | NM_011190 | <i>Psme2</i>    | proteasome (prosome, macropain) 28 subunit, beta                                         | 1.3 | 0.9 | 0.0  | -0.1 | 0.0  | 0.1  | 0.0  | 0.00 | 0.98 |
| A_51_P286737  | NM_011333 | <i>Ccl2</i>     | chemokine (C-C motif) ligand 2                                                           | 1.6 | 2.7 | -1.6 | 0.4  | -0.3 | 0.9  | 0.6  | 0.00 | 0.00 |
| A_51_P421734  | NM_011390 | <i>Slc12a7</i>  | solute carrier family 12, member 7                                                       | 1.1 | 0.3 | 0.6  | 0.2  | 0.2  | 0.5  | 0.3  | 0.00 | 0.00 |
| A_55_P1991219 | NM_011486 | <i>Stat3</i>    | signal transducer and activator of transcription 3                                       | 1.7 | 0.7 | -0.2 | -0.3 | 0.1  | 0.1  | 0.0  | 0.00 | 0.67 |
| A_55_P2017645 | NM_011530 | <i>Tap2</i>     | transporter 2, ATP-binding cassette, sub-family B (MDR/TAP)                              | 3.2 | 3.3 | -2.2 | -0.4 | -0.2 | 0.2  | -0.2 | 0.00 | 0.00 |

|               |           |               |                                                                                          |     |     |      |      |      |      |      |      |      |
|---------------|-----------|---------------|------------------------------------------------------------------------------------------|-----|-----|------|------|------|------|------|------|------|
| A_51_P478722  | NM_011579 | <i>Tgtp1</i>  | T-cell specific GTPase 1                                                                 | 5.7 | 5.3 | -0.4 | -1.0 | -0.6 | 0.1  | 0.2  | 0.00 | 0.40 |
| A_55_P2017636 | NM_011580 | <i>Thbs1</i>  | thrombospondin 1                                                                         | 1.1 | 0.0 | 1.5  | 0.5  | -0.7 | 0.8  | -0.7 | 0.01 | 0.00 |
| A_55_P2082902 | NM_011710 | <i>Wars</i>   | tryptophanyl-tRNA synthetase                                                             | 1.3 | 1.0 | -0.4 | -0.3 | 0.1  | 0.2  | 0.2  | 0.00 | 0.23 |
| A_55_P1983708 | NM_011832 | <i>Insrr</i>  | insulin receptor-related receptor                                                        | 1.6 | 0.8 | -0.6 | -0.1 | 0.0  | -0.1 | -0.1 | 0.00 | 0.02 |
| A_51_P387123  | NM_011854 | <i>Oasl2</i>  | 2'-5' oligoadenylate synthetase-like 2                                                   | 6.7 | 6.3 | -0.1 | -0.4 | -0.2 | -0.2 | -0.2 | 0.00 | 0.93 |
| A_55_P2114953 | NM_011909 | <i>Usp18</i>  | ubiquitin specific peptidase 18                                                          | 3.3 | 3.8 | 0.8  | -0.6 | -0.3 | -0.3 | -0.1 | 0.00 | 0.19 |
| A_51_P423976  | NM_013498 | <i>Crem</i>   | cAMP responsive element modulator                                                        | 1.4 | 1.7 | 2.2  | -0.4 | -0.2 | -0.2 | 0.1  | 0.00 | 0.00 |
| A_52_P460957  | NM_013498 | <i>Crem</i>   | cAMP responsive element modulator                                                        | 1.3 | 1.6 | 2.0  | -0.3 | -0.1 | -0.3 | 0.0  | 0.00 | 0.00 |
| A_51_P369803  | NM_013585 | <i>Psmb9</i>  | proteasome (prosome, macropain) subunit, beta type 9 (large multifunctional peptidase 2) | 5.7 | 5.1 | -2.1 | -0.3 | -0.1 | 0.1  | 0.1  | 0.00 | 0.00 |
| A_51_P514085  | NM_013606 | <i>Mx2</i>    | myxovirus (influenza virus) resistance 2                                                 | 3.0 | 3.6 | 0.6  | 0.0  | 0.0  | 0.1  | 0.0  | 0.00 | 0.27 |
| A_52_P570266  | NM_013640 | <i>Psmb10</i> | proteasome (prosome, macropain) subunit, beta type 10                                    | 2.5 | 2.2 | 0.4  | -0.2 | -0.2 | 0.0  | -0.2 | 0.00 | 0.12 |
| A_51_P436652  | NM_013654 | <i>Ccl7</i>   | chemokine (C-C motif) ligand 7                                                           | 1.4 | 3.2 | -2.3 | 0.8  | -0.2 | 1.3  | 0.6  | 0.00 | 0.00 |
| A_51_P100327  | NM_013683 | <i>Tap1</i>   | transporter 1, ATP-binding cassette, sub-family B (MDR/TAP)                              | 4.8 | 4.3 | -2.2 | -0.5 | -0.1 | 0.7  | 0.2  | 0.00 | 0.00 |
| A_51_P469968  | NM_013819 | <i>H2-M3</i>  | histocompatibility 2, M region locus 3                                                   | 1.6 | 1.6 | -1.5 | 0.2  | 0.4  | 0.4  | 0.5  | 0.00 | 0.00 |
| A_66_P128537  | NM_015783 | <i>Isg15</i>  | ISG15 ubiquitin-like modifier                                                            | 4.0 | 4.4 | 1.3  | -0.2 | 0.0  | -0.2 | -0.5 | 0.00 | 0.01 |
| A_55_P2103698 | NM_015783 | <i>Isg15</i>  | ISG15 ubiquitin-like modifier                                                            | 3.9 | 4.7 | 1.5  | -0.1 | -0.1 | -0.2 | -0.1 | 0.00 | 0.00 |
| A_51_P421876  | NM_016850 | <i>Irf7</i>   | interferon regulatory factor 7                                                           | 2.9 | 3.4 | -0.2 | -0.7 | -0.1 | -0.2 | -0.1 | 0.00 | 0.72 |
| A_55_P2472435 | NM_018734 | <i>Gbp3</i>   | guanylate binding protein 3                                                              | 7.0 | 6.7 | -1.3 | -0.6 | -0.6 | -0.1 | -0.2 | 0.00 | 0.00 |

|               |           |                |                                                          |     |     |      |      |      |      |      |      |      |
|---------------|-----------|----------------|----------------------------------------------------------|-----|-----|------|------|------|------|------|------|------|
| A_51_P112355  | NM_018738 | <i>Igtp</i>    | interferon gamma induced GTPase                          | 8.6 | 8.8 | -0.5 | -0.4 | -0.5 | 0.6  | 0.2  | 0.00 | 0.13 |
| A_52_P466090  | NM_018851 | <i>Samhd1</i>  | SAM domain and HD domain, 1                              | 1.4 | 1.5 | 0.7  | -0.3 | -0.2 | 0.1  | 0.0  | 0.00 | 0.01 |
| A_55_P2137611 | NM_019440 | <i>Irgm2</i>   | immunity-related GTPase family M member 2                | 7.5 | 7.2 | -0.8 | -0.6 | -0.5 | 0.2  | -0.1 | 0.00 | 0.03 |
| A_55_P2031125 | NM_019949 | <i>Ube2l6</i>  | ubiquitin-conjugating enzyme E2L 6                       | 1.6 | 1.4 | -0.9 | -0.2 | -0.2 | -0.3 | -0.4 | 0.00 | 0.00 |
| A_55_P2059606 | NM_019963 | <i>Stat2</i>   | signal transducer and activator of transcription 2       | 3.3 | 2.5 | -0.5 | -0.3 | -0.2 | -0.1 | -0.2 | 0.00 | 0.08 |
| A_55_P2158404 | NM_020557 | <i>Cmpk2</i>   | cytidine monophosphate (UMP-CMP) kinase 2, mitochondrial | 2.9 | 0.8 | -2.1 | -0.2 | 0.0  | 0.0  | -0.5 | 0.00 | 0.00 |
| A_52_P186937  | NM_020557 | <i>Cmpk2</i>   | cytidine monophosphate (UMP-CMP) kinase 2, mitochondrial | 2.5 | 0.7 | -1.8 | -0.1 | 0.1  | -0.1 | -0.5 | 0.00 | 0.00 |
| A_55_P2016462 | NM_021274 | <i>Cxcl10</i>  | chemokine (C-X-C motif) ligand 10                        | 6.2 | 5.6 | 2.6  | -0.6 | -0.8 | -0.5 | -0.2 | 0.00 | 0.00 |
| A_66_P139683  | NM_021394 | <i>Zbp1</i>    | Z-DNA binding protein 1                                  | 2.7 | 3.5 | 0.8  | -0.5 | -0.4 | 0.0  | 0.2  | 0.00 | 0.13 |
| A_51_P464703  | NM_021443 | <i>Ccl8</i>    | chemokine (C-C motif) ligand 8                           | 2.5 | 2.0 | -2.0 | 0.0  | -0.2 | 0.1  | -0.1 | 0.00 | 0.00 |
| A_51_P248666  | NM_021893 | <i>Cd274</i>   | CD274 antigen                                            | 5.7 | 4.4 | -0.9 | -0.8 | -0.8 | -0.2 | 0.1  | 0.00 | 0.04 |
| A_52_P338066  | NM_023137 | <i>Ubd</i>     | ubiquitin D                                              | 1.9 | 3.2 | 1.3  | 0.3  | 0.2  | -0.1 | 0.3  | 0.00 | 0.00 |
| A_55_P2041828 | NM_023279 | <i>Tubb3</i>   | tubulin, beta 3                                          | 2.7 | 1.3 | -0.6 | -0.4 | 0.4  | 0.0  | 0.5  | 0.00 | 0.05 |
| A_51_P304170  | NM_023386 | <i>Rtp4</i>    | receptor transporter protein 4                           | 5.0 | 5.1 | -0.1 | -0.2 | -0.1 | 0.0  | -0.2 | 0.00 | 0.96 |
| A_55_P2026233 | NM_023738 | <i>Uba7</i>    | ubiquitin-like modifier activating enzyme 7              | 2.6 | 1.3 | 0.0  | -0.3 | 0.0  | 0.2  | -0.4 | 0.00 | 0.98 |
| A_52_P267391  | NM_023835 | <i>Trim12a</i> | tripartite motif-containing 12A                          | 2.5 | 2.5 | -1.5 | 0.0  | 0.1  | -0.1 | 0.1  | 0.00 | 0.00 |
| A_55_P2064659 | NM_023835 | <i>Trim12a</i> | tripartite motif-containing 12A                          | 2.1 | 1.5 | -1.4 | -0.1 | 0.2  | 0.2  | 0.0  | 0.00 | 0.00 |
| A_51_P187842  | NM_025829 | <i>Eif4e3</i>  | eukaryotic translation initiation factor 4E member 3     | 1.4 | 0.6 | -2.3 | 0.1  | 0.4  | 0.0  | 0.0  | 0.00 | 0.00 |
| A_52_P679860  | NM_025992 | <i>Herc6</i>   | hect domain and                                          | 2.2 | 2.1 | 0.4  | -0.2 | 0.1  | 0.0  | 0.7  | 0.00 | 0.19 |

|               |           |                      |                                                                 |     |     |      |      |      |      |      |      |      |
|---------------|-----------|----------------------|-----------------------------------------------------------------|-----|-----|------|------|------|------|------|------|------|
|               |           |                      | RLD 6                                                           |     |     |      |      |      |      |      |      |      |
| A_52_P64514   | NM_025992 | <i>Herc6</i>         | hect domain and RLD 6                                           | 2.2 | 2.0 | 0.6  | -0.5 | 0.1  | 0.1  | 0.3  | 0.00 | 0.20 |
| A_52_P641758  | NM_026637 | <i>Ggct</i>          | gamma-glutamyl cyclotransferase                                 | 1.1 | 1.0 | 1.5  | 0.2  | -0.6 | 0.5  | -0.4 | 0.02 | 0.00 |
| A_66_P122110  | NM_026913 | <i>Mitd1</i>         | MIT, microtubule interacting and transport, domain containing 1 | 1.3 | 1.1 | -0.6 | -0.3 | 0.0  | -0.2 | -0.2 | 0.00 | 0.00 |
| A_51_P414889  | NM_027320 | <i>Ifi35</i>         | interferon-induced protein 35                                   | 1.8 | 1.7 | -0.1 | -0.3 | 0.0  | 0.1  | -0.2 | 0.00 | 0.86 |
| A_55_P1978987 | NM_027835 | <i>Ifih1</i>         | interferon induced with helicase C domain 1                     | 2.7 | 1.4 | 0.7  | -0.2 | 0.1  | 0.4  | 0.6  | 0.00 | 0.06 |
| A_55_P2005783 | NM_027835 | <i>Ifih1</i>         | interferon induced with helicase C domain 1                     | 1.5 | 1.1 | 0.5  | -0.4 | 0.4  | 0.2  | 0.5  | 0.00 | 0.02 |
| A_51_P120093  | NM_028035 | <i>Snx10</i>         | sorting nexin 10                                                | 1.2 | 1.0 | 0.5  | -0.2 | -0.1 | -0.2 | 0.0  | 0.00 | 0.00 |
| A_66_P110343  | NM_028035 | <i>Snx10</i>         | sorting nexin 10                                                | 1.2 | 0.9 | 0.6  | -0.1 | -0.2 | -0.1 | -0.1 | 0.00 | 0.00 |
| A_51_P240801  | NM_028261 | <i>Tmem173</i>       | transmembrane protein 173                                       | 1.3 | 1.2 | 0.3  | -0.1 | -0.2 | -0.1 | -0.3 | 0.00 | 0.38 |
| A_55_P2022604 | NM_028807 | <i>1200009I06Rik</i> | RIKEN cDNA 1200009I06 gene                                      | 1.2 | 0.4 | -0.8 | 0.2  | -0.4 | 0.1  | -0.2 | 0.00 | 0.00 |
| A_51_P165182  | NM_028967 | <i>Batf2</i>         | basic leucine zipper transcription factor, ATF-like 2           | 4.1 | 5.5 | 1.7  | -0.6 | -1.2 | -0.1 | -0.2 | 0.00 | 0.00 |
| A_55_P1996973 | NM_029000 | <i>Gvin1</i>         | GTPase, very large interferon inducible 1                       | 6.0 | 2.5 | 4.3  | -0.2 | -0.2 | 0.5  | -0.2 | 0.00 | 0.00 |
| A_52_P535484  | NM_029000 | <i>Gvin1</i>         | GTPase, very large interferon inducible 1                       | 3.3 | 2.6 | 3.9  | -0.2 | -0.3 | 0.1  | -0.1 | 0.00 | 0.00 |
| A_51_P444290  | NM_029084 | <i>Slamf8</i>        | SLAM family member 8                                            | 2.4 | 1.9 | -0.3 | 0.2  | 0.2  | -0.1 | 0.0  | 0.00 | 0.52 |
| A_55_P2068607 | NM_029219 | <i>Rnf19b</i>        | ring finger protein 19B                                         | 3.1 | 2.1 | 0.5  | -0.1 | -0.2 | 0.2  | -0.1 | 0.00 | 0.05 |
| A_55_P1964262 | NM_029419 | <i>Apol7a</i>        | apolipoprotein L 7a                                             | 1.6 | 1.6 | -1.8 | -0.1 | 0.1  | 0.2  | 0.4  | 0.00 | 0.00 |
| A_51_P497724  | NM_029419 | <i>Apol7a</i>        | apolipoprotein L 7a                                             | 1.0 | 0.3 | -1.0 | 0.0  | 0.3  | 0.3  | 0.3  | 0.02 | 0.00 |
| A_55_P2142863 | NM_030253 | <i>Parp9</i>         | poly (ADP-ribose) polymerase family, member 9                   | 4.2 | 3.3 | 0.6  | -0.3 | -0.1 | 0.5  | 0.0  | 0.00 | 0.01 |
| A_66_P105689  | NM_030684 | <i>Trim34a</i>       | tripartite motif-                                               | 2.9 | 2.8 | -0.6 | 0.0  | -0.2 | 0.4  | -0.1 | 0.00 | 0.06 |

|               |           |                 |                                           |     |     |      |      |      |      |      |      |      |
|---------------|-----------|-----------------|-------------------------------------------|-----|-----|------|------|------|------|------|------|------|
|               |           |                 | containing 34A                            |     |     |      |      |      |      |      |      |      |
| A_65_P04284   | NM_030711 | <i>Erap1</i>    | endoplasmic reticulum aminopeptidase 1    | 1.1 | 1.0 | -0.7 | 0.2  | 0.4  | 0.5  | 0.5  | 0.00 | 0.00 |
| A_55_P2166049 | NM_030738 | <i>Vmn1r65</i>  | vomeroneasal 1 receptor 65                | 5.2 | 3.1 | -1.6 | -0.9 | -1.6 | -0.2 | -0.6 | 0.00 | 0.00 |
| A_55_P1958255 | NM_030743 | <i>Rnf114</i>   | ring finger protein 114                   | 1.1 | 1.0 | -0.1 | -0.1 | 0.2  | 0.1  | 0.1  | 0.00 | 0.78 |
| A_55_P1998957 | NM_033541 | <i>Oas1c</i>    | 2'-5' oligoadenylate synthetase 1C        | 1.1 | 1.0 | -1.9 | 0.2  | 0.5  | 0.3  | 0.2  | 0.00 | 0.00 |
| A_55_P2066116 | NM_033601 | <i>Bcl3</i>     | B-cell leukemia/lymphoma 3                | 2.1 | 1.5 | 2.3  | -0.4 | -0.2 | -0.7 | -0.2 | 0.00 | 0.00 |
| A_55_P2115442 | NM_053109 | <i>Clec2d</i>   | C-type lectin domain family 2, member d   | 1.3 | 2.2 | -1.1 | 0.1  | -0.3 | -0.1 | -0.4 | 0.03 | 0.01 |
| A_52_P85174   | NM_126166 | <i>Tlr3</i>     | toll-like receptor 3                      | 1.5 | 1.4 | 0.1  | -0.3 | 0.1  | 0.3  | 0.1  | 0.00 | 0.95 |
| A_55_P2037121 | NM_144830 | <i>Tmem106a</i> | transmembrane protein 106A                | 1.1 | 0.9 | 0.0  | -0.3 | 0.2  | 0.2  | 0.2  | 0.00 | 1.00 |
| A_51_P154842  | NM_145153 | <i>Oas1f</i>    | 2'-5' oligoadenylate synthetase 1F        | 1.1 | 1.2 | -0.2 | 0.0  | 0.1  | 0.3  | 0.1  | 0.04 | 0.71 |
| A_55_P1998943 | NM_145211 | <i>Oas1a</i>    | 2'-5' oligoadenylate synthetase 1A        | 1.5 | 1.7 | 0.4  | 0.2  | 0.1  | -0.1 | -0.1 | 0.03 | 0.55 |
| A_55_P2019719 | NM_145227 | <i>Oas2</i>     | 2'-5' oligoadenylate synthetase 2         | 2.0 | 1.8 | -0.3 | -0.1 | 0.3  | -0.1 | -0.1 | 0.01 | 0.79 |
| A_51_P505795  | NM_145391 | <i>Tapbp1</i>   | TAP binding protein-like                  | 2.5 | 1.9 | -0.3 | -0.2 | -0.1 | 0.1  | -0.1 | 0.00 | 0.28 |
| A_51_P463846  | NM_145545 | <i>Gbp6</i>     | guanylate binding protein 6               | 6.3 | 6.3 | -1.0 | -0.8 | -0.5 | 0.0  | -0.1 | 0.00 | 0.03 |
| A_51_P273609  | NM_146125 | <i>Itpka</i>    | inositol 1,4,5-trisphosphate 3-kinase A   | 1.6 | 1.5 | 0.3  | -0.4 | -0.1 | 0.0  | 0.1  | 0.00 | 0.39 |
| A_52_P327664  | NM_153564 | <i>Gbp5</i>     | guanylate binding protein 5               | 2.0 | 1.5 | -0.3 | 0.0  | -0.3 | -0.1 | -0.5 | 0.00 | 0.50 |
| A_55_P2116059 | NM_172393 | <i>Aim1</i>     | absent in melanoma 1                      | 2.0 | 0.2 | 3.6  | -0.4 | 0.0  | -0.4 | 0.0  | 0.00 | 0.00 |
| A_52_P385536  | NM_172689 | <i>Ddx58</i>    | DEAD (Asp-Glu-Ala-Asp) box polypeptide 58 | 2.0 | 2.4 | 0.4  | -0.5 | -0.3 | -0.4 | -0.6 | 0.00 | 0.22 |
| A_55_P1965000 | NM_172689 | <i>Ddx58</i>    | DEAD (Asp-Glu-Ala-Asp) box polypeptide 58 | 2.0 | 2.5 | 0.1  | -0.5 | -0.2 | -0.5 | -0.3 | 0.00 | 0.92 |
| A_51_P234113  | NM_172729 | <i>Nod1</i>     | nucleotide-binding                        | 2.6 | 2.7 | 0.7  | -0.3 | -0.8 | -0.2 | -0.3 | 0.00 | 0.10 |

|               |           |                  |                                                        |     |     |      |      |      |      |      |      |      |
|---------------|-----------|------------------|--------------------------------------------------------|-----|-----|------|------|------|------|------|------|------|
|               |           |                  | oligomerization domain containing 1                    |     |     |      |      |      |      |      |      |      |
| A_55_P2131088 | NM_172767 | <i>Vwa5a</i>     | von Willebrand factor A domain containing 5A           | 1.1 | 1.1 | -0.3 | -0.5 | -0.3 | -0.4 | -0.4 | 0.04 | 0.62 |
| A_66_P131754  | NM_172767 | <i>Vwa5a</i>     | von Willebrand factor A domain containing 5A           | 1.1 | 1.2 | 0.1  | -0.4 | -0.2 | -0.3 | -0.2 | 0.04 | 0.95 |
| A_66_P140742  | NM_172875 | <i>Adc</i>       | arginine decarboxylase                                 | 1.2 | 0.5 | 1.5  | 0.0  | 0.0  | 0.2  | -0.2 | 0.01 | 0.00 |
| A_51_P214747  | NM_172893 | <i>Parp12</i>    | poly (ADP-ribose) polymerase family, member 12         | 2.1 | 2.1 | -0.1 | -0.6 | -0.2 | -0.2 | 0.1  | 0.00 | 0.94 |
| A_55_P2107775 | NM_173786 | <i>Apol9a</i>    | apolipoprotein L 9a                                    | 3.1 | 3.8 | 0.5  | -0.1 | 0.0  | 0.1  | 0.3  | 0.00 | 0.15 |
| A_55_P2043367 | NM_173786 | <i>Apol9a</i>    | apolipoprotein L 9a                                    | 3.1 | 3.7 | 0.6  | 0.0  | 0.0  | 0.0  | 0.0  | 0.00 | 0.02 |
| A_52_P650028  | NM_175291 | <i>Dock10</i>    | dedicator of cytokinesis 10                            | 1.3 | 0.0 | -2.1 | 0.5  | 0.0  | 0.8  | 0.2  | 0.01 | 0.00 |
| A_51_P100852  | NM_175449 | <i>Fam26f</i>    | family with sequence similarity 26, member F           | 1.9 | 2.1 | 0.3  | -0.2 | 0.0  | 0.0  | -0.2 | 0.00 | 0.58 |
| A_51_P501844  | NM_175475 | <i>Cyp26b1</i>   | cytochrome P450, family 26, subfamily b, polypeptide 1 | 1.7 | 0.4 | 1.9  | 0.4  | -0.5 | 0.6  | -0.5 | 0.00 | 0.00 |
| A_55_P2006494 | NM_177820 | <i>Apol10b</i>   | apolipoprotein L 10b                                   | 2.9 | 2.1 | -1.9 | 0.3  | 0.0  | 0.4  | 0.0  | 0.00 | 0.00 |
| A_55_P2084418 | NM_178005 | <i>Lrrtm2</i>    | leucine rich repeat transmembrane neuronal 2           | 2.3 | 1.7 | 1.0  | -0.4 | -1.1 | -0.4 | -0.8 | 0.00 | 0.00 |
| A_55_P2084413 | NM_178005 | <i>Lrrtm2</i>    | leucine rich repeat transmembrane neuronal 2           | 1.2 | 1.6 | 1.0  | -0.5 | -0.9 | 0.0  | -0.2 | 0.00 | 0.00 |
| A_55_P1959303 | NM_178446 | <i>Rbm47</i>     | RNA binding motif protein 47                           | 2.1 | 0.5 | 1.9  | -0.1 | -0.1 | -0.1 | 0.2  | 0.00 | 0.00 |
| A_55_P1959305 | NM_178446 | <i>Rbm47</i>     | RNA binding motif protein 47                           | 1.2 | 0.5 | 1.8  | 0.2  | 0.0  | 0.2  | 0.4  | 0.04 | 0.00 |
| A_52_P220783  | NM_178745 | <i>Tmem229b</i>  | transmembrane protein 229B                             | 1.4 | 0.8 | -1.6 | -0.1 | -0.1 | 0.1  | -0.1 | 0.00 | 0.00 |
| A_55_P2113256 | NM_181402 | <i>Parp11</i>    | poly (ADP-ribose) polymerase family, member 11         | 1.0 | 0.6 | 0.0  | -0.1 | 0.0  | 0.3  | 0.0  | 0.01 | 0.99 |
| A_55_P2135200 | NM_181542 | <i>Slfn10-ps</i> | schlafen 10, pseudogene                                | 1.7 | 0.6 | -1.3 | -0.2 | 0.2  | -0.1 | -0.3 | 0.03 | 0.01 |



|               |           |                      |                                                    |     |     |      |      |      |      |      |      |      |
|---------------|-----------|----------------------|----------------------------------------------------|-----|-----|------|------|------|------|------|------|------|
| A_55_P2117656 | NM_181545 | <i>Slfn8</i>         | schlafen 8                                         | 2.5 | 0.8 | -1.8 | -0.2 | 0.1  | 0.1  | 0.6  | 0.00 | 0.00 |
| A_55_P2026572 | NM_183087 | <i>Fam189a1</i>      | family with sequence similarity 189, member A1     | 1.5 | 0.8 | -3.3 | 0.7  | 0.5  | 0.9  | 0.4  | 0.00 | 0.00 |
| A_55_P1959953 | NM_183162 | <i>BC006779</i>      | cDNA sequence BC006779                             | 1.5 | 1.6 | 0.2  | -0.1 | 0.0  | 0.1  | 0.1  | 0.00 | 0.64 |
| A_52_P616392  | NM_183426 | <i>Sbno2</i>         | strawberry notch homolog 2 (Drosophila)            | 1.3 | 0.9 | 0.2  | 0.0  | -0.2 | 0.2  | -0.3 | 0.00 | 0.68 |
| A_55_P2052385 | NM_194336 | <i>Mpa2l</i>         | macrophage activation 2 like                       | 6.8 | 4.3 | -2.7 | -0.6 | -0.2 | 0.1  | -0.1 | 0.00 | 0.00 |
| A_55_P2052380 | NM_194336 | <i>Mpa2l</i>         | macrophage activation 2 like                       | 4.8 | 2.3 | -2.3 | -0.9 | -0.6 | -0.4 | -0.4 | 0.00 | 0.00 |
| A_55_P2165074 | NM_194346 | <i>Rnf31</i>         | ring finger protein 31                             | 1.4 | 1.1 | 0.0  | 0.1  | 0.0  | 0.2  | 0.0  | 0.00 | 0.95 |
| A_51_P191469  | NM_194346 | <i>Rnf31</i>         | ring finger protein 31                             | 1.3 | 1.1 | 0.0  | 0.1  | 0.0  | 0.1  | 0.0  | 0.00 | 1.00 |
| A_52_P463977  | NM_197986 | <i>Tmem140</i>       | transmembrane protein 140                          | 4.4 | 3.6 | 1.1  | -0.4 | -0.4 | 0.2  | -0.1 | 0.00 | 0.01 |
| A_52_P335609  | NM_198004 | <i>5133401N09Rik</i> | RIKEN cDNA 5133401N09 gene                         | 1.6 | 1.5 | -0.9 | -0.3 | -0.4 | -0.1 | -0.2 | 0.00 | 0.00 |
| A_51_P169693  | NM_198095 | <i>Bst2</i>          | bone marrow stromal cell antigen 2                 | 2.2 | 1.6 | 0.5  | 0.1  | 0.2  | 0.6  | 0.2  | 0.00 | 0.03 |
| A_55_P2015687 | NM_199015 | <i>D14Ertd668e</i>   | DNA segment, Chr 14, ERATO Doi 668, expressed      | 1.9 | 3.7 | 5.1  | 0.1  | 0.2  | 0.0  | 0.6  | 0.00 | 0.00 |
| A_52_P199633  | NM_199146 | <i>Trim30d</i>       | tripartite motif-containing 30D                    | 1.9 | 0.2 | -2.4 | -0.1 | 0.2  | 0.1  | -0.2 | 0.00 | 0.00 |
| A_52_P326664  | NM_199252 | <i>Unc93a</i>        | unc-93 homolog A (C. elegans)                      | 1.8 | 1.8 | -0.2 | -0.6 | -0.2 | 0.2  | 0.1  | 0.01 | 0.83 |
| A_55_P2139763 | NM_201373 | <i>Trim56</i>        | tripartite motif-containing 56                     | 1.1 | 1.0 | -0.4 | -0.2 | -0.3 | -0.1 | -0.3 | 0.00 | 0.17 |
| A_55_P1978506 | NM_207648 | <i>H2-Q6</i>         | histocompatibility 2, Q region locus 6             | 1.0 | 0.5 | 1.1  | -0.2 | -0.1 | -0.1 | 0.0  | 0.00 | 0.00 |
| A_51_P201480  | NM_213659 | <i>Stat3</i>         | signal transducer and activator of transcription 3 | 1.5 | 0.8 | -0.1 | -0.1 | -0.3 | 0.0  | -0.2 | 0.00 | 0.93 |
| A_55_P2100620 | NR_033332 | <i>Gm12216</i>       | predicted gene 12216                               | 2.8 | 2.1 | -0.4 | 0.1  | -0.2 | 0.0  | -0.2 | 0.00 | 0.24 |
| A_52_P69558   | NR_033577 | <i>Gm8221</i>        | apolipoprotein L, 3-like                           | 1.3 | 0.6 | -1.3 | -0.2 | 0.3  | 0.2  | 0.0  | 0.00 | 0.00 |
| A_55_P2213828 | NR_038025 | <i>4933412E12Rik</i> | RIKEN cDNA 4933412E12 gene                         | 1.0 | 1.2 | 0.1  | -0.1 | -0.2 | -0.1 | -0.2 | 0.00 | 0.87 |

|               |              |                |                                                           |     |     |      |      |      |      |      |      |      |
|---------------|--------------|----------------|-----------------------------------------------------------|-----|-----|------|------|------|------|------|------|------|
| A_55_P2243431 | NR_045032    | <i>Gdap10</i>  | ganglioside-induced differentiation-associated-protein 10 | 1.6 | 1.4 | -0.9 | -0.3 | -0.2 | 0.0  | 0.1  | 0.00 | 0.00 |
| A_52_P431615  | XM_001000891 | <i>Gm1966</i>  | predicted gene 1966                                       | 3.0 | 2.8 | 4.2  | -0.2 | -0.1 | 0.4  | 0.1  | 0.00 | 0.00 |
| A_55_P2173210 | XM_003084464 | <i>Gm16340</i> | predicted gene 16340                                      | 2.5 | 3.3 | 2.8  | 0.4  | 0.0  | 0.4  | 0.2  | 0.00 | 0.00 |
| A_55_P1972582 | XM_136331    | <i>Gm4955</i>  | predicted gene 4955                                       | 1.9 | 0.6 | -1.3 | -0.6 | -0.3 | 0.0  | 0.1  | 0.00 | 0.00 |
| A_55_P2004007 | XM_136331    | <i>Gm4955</i>  | predicted gene 4955                                       | 1.6 | 0.2 | -1.4 | -0.7 | 0.0  | -0.2 | -0.1 | 0.00 | 0.00 |

Genes significantly (p-value < 0.05) induced at least 2-fold by IFN- $\gamma$  are shown (in alphabetical order). Fold differences (log 2-transformed) and p-values derived from three biological replicates for each condition are depicted. Key: WT = WT MEFs; SA = S727A MEFs; siCtrl = sample treated with control siRNA; siCdk8 = sample treated with Cdk8 siRNA; g = sample stimulated for 4 h with IFN- $\gamma$ ; 0 = sample not stimulated with IFN- $\gamma$

**Table S5. Overlap of Genes Similarly Affected by S727A Mutation and *Cdk8* Silencing**

| Genbank AC         | Gene symbol          | Type of change |
|--------------------|----------------------|----------------|
| NM_001146007       | <i>9230105E10Rik</i> | down           |
| NM_029419          | <i>Apol7a</i>        | down           |
| NM_020557          | <i>Cmpk2</i>         | down           |
| NM_020557          | <i>Cmpk2</i>         | down           |
| NM_001190466       | <i>Dact1</i>         | down           |
| NM_001190466       | <i>Dact1</i>         | down           |
| NM_010171          | <i>F3</i>            | down           |
| NM_001101475       | <i>F830016B08Rik</i> | down           |
| NM_001039646       | <i>Gbp10</i>         | down           |
| NM_001039647       | <i>Gbp11</i>         | down           |
| NM_010260          | <i>Gbp2</i>          | down           |
| NM_018734          | <i>Gbp3</i>          | down           |
| NM_001256005       | <i>Gbp4</i>          | down           |
| NM_145545          | <i>Gbp6</i>          | down           |
| NM_001045540       | <i>Gm12185</i>       | down           |
| NM_001135115       | <i>Gm12250</i>       | down           |
| NM_001034859       | <i>Gm4841</i>        | down           |
| NM_001033767       | <i>Gm4951</i>        | down           |
| XM_136331          | <i>Gm4955</i>        | down           |
| XM_136331          | <i>Gm4955</i>        | down           |
| NR_033577          | <i>Gm8221</i>        | down           |
| NM_001013828       | <i>ligp1b</i>        | down           |
| NM_008320          | <i>Irf8</i>          | down           |
| NM_194336          | <i>Mpa2l</i>         | down           |
| NM_194336          | <i>Mpa2l</i>         | down           |
| NM_001083925       | <i>Oas1b</i>         | down           |
| NM_010724          | <i>Psmb8</i>         | down           |
| ENSMUST00000114230 | <i>Psmb9</i>         | down           |
| NM_013585          | <i>Psmb9</i>         | down           |
| NM_001168294       | <i>Serpina3f</i>     | down           |
| NM_001199940       | <i>Serpina3i</i>     | down           |
| NM_181542          | <i>Slfn10-ps</i>     | down           |
| NM_181545          | <i>Slfn8</i>         | down           |
| NM_009896          | <i>Socs1</i>         | down           |
| NM_013683          | <i>Tap1</i>          | down           |
| NM_011530          | <i>Tap2</i>          | down           |
| NM_178745          | <i>Tmem229b</i>      | down           |
| NM_023835          | <i>Trim12a</i>       | down           |
| NM_009277          | <i>Trim21</i>        | down           |
| NM_199146          | <i>Trim30d</i>       | down           |
| NM_030738          | <i>Vmn1r65</i>       | down           |

|              |                   |      |
|--------------|-------------------|------|
| NM_001037713 | <i>Xaf1</i>       | down |
| NM_001037713 | <i>Xaf1</i>       | down |
| NM_001204910 | <i>Al607873</i>   | up   |
| NM_007609    | <i>Casp4</i>      | up   |
| NM_007609    | <i>Casp4</i>      | up   |
| NM_008599    | <i>Cxcl9</i>      | up   |
| NM_175475    | <i>Cyp26b1</i>    | up   |
| NM_199015    | <i>D14Ert668e</i> | up   |
| NM_026637    | <i>Ggct</i>       | up   |
| XM_003084464 | <i>Gm16340</i>    | up   |
| NM_001045481 | <i>Ifi203</i>     | up   |
| NM_001045481 | <i>Ifi203</i>     | up   |
| NM_008329    | <i>Ifi204</i>     | up   |
| BC010546     | <i>Ifi204</i>     | up   |
| NM_011019    | <i>Osmr</i>       | up   |
| NM_178446    | <i>Rbm47</i>      | up   |
| NM_011580    | <i>Thbs1</i>      | up   |
| NM_023137    | <i>Ubd</i>        | up   |
| NM_001139519 | <i>Zbp1</i>       | up   |

IFN- $\gamma$ -induced genes (in alphabetical order) either down-regulated by both, the S727A mutation and *Cdk8* silencing, or up-regulated under the same conditions. Genes that appear more than once have different probe set IDs for each listing. Data are extracted from the Table S4.

## Supplemental Experimental Procedures

### RNAi-Mediated Silencing

Approx.  $2 \times 10^5$  (or  $5 \times 10^5$ ) MEFs were seeded in 3,5 cm (or 6 cm) format in DMEM supplemented with 10% FCS without antibiotics. Next day the medium was replaced with 2.5 ml (or 5 ml) fresh medium and cells were transfected with 50 pmol (or 100 pmol) ON-TARGET plus<sup>TM</sup> SMART pool siRNA (Dharmacon) using Lipofectamine<sup>TM</sup> RNAiMAX Reagent in Opti-MEM I (both Invitrogen). After 48 hours cells were used for whole cell extract preparation or RNA isolation.

### Immunoblotting

Procedures for whole cell extracts, immunoprecipitation and immunoblotting were as described (Sadzak et al., 2008). Primary antibodies used to detect proteins are described in antibody list (below).

### Chromatin Immunoprecipitation

Chromatin Immunoprecipitation assay (ChIP) was performed as in (Hauser et al., 2002) with the following modifications. To pull down the antibodies Protein G Dynabeads (Invitrogen) were used. The amount of immunoprecipitated DNA was quantified in qPCR using Kapa Sybr Fast qPCR Universal Mix (Peqlab) and primers described in the primer list (below). All qPCRs were run on Mastercycler ep realplex<sup>2</sup> (Eppendorf). Values of immunoprecipitated DNA were shown as % input. Antibodies used in ChIP assay are specified in the antibody list (below).

### Purification of Recombinant Proteins

Plasmids encoding STAT1 GST fusion proteins (GST-STAT1-WT aa711-750 and the corresponding S727A mutant) were described (Kovarik et al., 1999). STAT3 and STAT5a GST fusion proteins (GST-STAT3-WT aa715-770 and the corresponding S727A mutant, GST-STAT5a-WT aa704-793 and the corresponding S725A and S779A single mutants and S725A/S779A double mutant) were obtained by cloning the TADs into pGEX-4T1 (Promega). Standard techniques for expression and purification of GST fusion proteins were used. The four protein CDK8 module was expressed and purified according to (Knuesel et al., 2009b). The TFIIH complex was purified from HeLa cells as described in (Knuesel et al., 2009a). P-TEFb was isolated following recombinant expression in insect cells. Sf9 cells were co-infected with high-titer virus at a multiplicity of infection ratio of 1:2 (CDK9:Cyc T1) for 48 h at 27°C. P-TEFb was purified from Sf9 cell pellets as described (Tahirov et al.).

### Kinase Assays

Reactions were performed with 1  $\mu$ l CDK8 module, 1  $\mu$ l TFIIH, and 0.75  $\mu$ l P-TEFb with 500 ng GST-RNAPII CTD and 750 ng of GST-STAT-TAD (STAT1, STAT3, STAT5a and the corresponding mutants) or GST only in kinase buffer (25 mM Tris pH 8.0, 100 mM KCl, 100  $\mu$ M ATP, 10 mM MgCl<sub>2</sub>, and 2 mM DTT) with 2.5  $\mu$ Ci [ $\gamma$ -<sup>32</sup>P]ATP at 30°C for 60 min. SDS-PAGE was used to separate proteins and the gels were subsequently silver stained, dried at 55°C for 60 min, exposed on a phosphor-imager screen for 18 h, and imaged using a Typhoon 9400 scanner. Quantitation of auto-rad bands was performed using ImageJ.

### Microarray Analysis

STAT1 WT and STAT1 S727A MEFs were treated with siRNA as described above and stimulated with IFN- $\gamma$  for 4 h or left untreated. Total RNA was isolated from cells using TRIzol reagent (Invitrogen) following the manufactures protocol and used for expression analysis using Agilent Whole Mouse Genome Microarrays, 8x60K. Standard protocols for labeling and hybridization were followed. In brief, fluorescent cRNA was generated using Low Input Quick

Amp Labeling Kit (Agilent). The amplified cyanine 3-labeled cRNA samples were then purified using SV Total RNA Isolation System (Promega) and hybridized to microarray slides. Microarray slides were washed and scanned with an Agilent Scanner.

Information from probe features was extracted from microarray scan images using the Agilent Feature Extraction software v10.7.3. Further analyses were performed using R and Bioconductor (Gentleman et al., 2004). Arrays were assessed for quality, weighted and quantile normalized. Subsequently the data were log transformed and filtered for low expression. Residual variances were adjusted using an empirical bayes method (Smyth, 2004) to obtain approximately t-distributed differences in gene expression values. P-values were adjusted for multiple testing using the false discovery rate (Reiner et al., 2003). Microarray data have been deposited in Gene Expression Omnibus under the accession number GSE40728 (GEO, <http://www.ncbi.nlm.nih.gov/geo/info/linking.html>).

### **Quantitation of Gene Expression by Quantitative RT-PCR (qRT-PCR)**

To measure mRNA expression total RNA was reverse transcribed using oligo (dT)18 primer and Mu-MLV reverse transcriptase (Fermentas). cDNA was amplified with GoTaq qPCR Master Mix (Promega) and primers described in the primer list (below). qRT-PCR was performed using Mastercycler ep realplex2 (Eppendorf). To measure the abundance of primary transcript RNA was digested with DNase I (Roche), purified with RNeasy MiniElute Cleanup Kit (Qiagen) and reverse transcribed using random primers (nonamers) and Superscript III Reverse Transcriptase (Invitrogen).

### **Metabolic labeling of RNA**

Metabolic labeling, biotinylation and purification of nascent RNA were performed as described (Dolken et al., 2008). Briefly, 4-thiouridine (4sU) (100  $\mu$ M) was added to the cell culture medium 30 min prior to IFN- $\gamma$  stimulation, simultaneously with IFN- $\gamma$ , or 60 min and 210 min after IFN- $\gamma$  stimulation. Labeling was stopped after 30 minutes and total cellular RNA was isolated from cells using TRIzol reagent (Invitrogen) following manufacturer's protocol. RNA was treated with recombinant RNase-free DNase I (Roche) 0.2 U/ $\mu$ l for 30 minutes at 37°C in order to remove genomic DNA contamination.

Biotinylation was carried out in biotinylation buffer (10 mM Tris, 1 mM EDTA) and 0.2 mg/mL Biotin-HPDP at a final RNA concentration of 100 ng/ $\mu$ L for 2 h at 25°C with shaking. Unbound biotin was removed with chloroform/isoamylalcohol. RNA was precipitated at 16000g at 4°C with equal volume of isopropanol and 1:10 volume of 5M sodium chloride. Biotinylated RNA was captured using  $\mu$ MACS streptavidin beads and columns (Miltyeni). Nascent RNA was eluted from streptavidin beads by applying twice 100  $\mu$ l of 100 mM dithiothreitol (DTT) to the column. RNA was recovered from eluates using the RNeasy MinElute Spin columns (Qiagen). RNA was reverse transcribed using SuperScript III (Invitrogen) and oligo-dT(18) primers following manufacturer's instructions. For reverse transcription reaction 100 ng of nascent RNA or 1  $\mu$ g of Total RNA was used. *ActB* was used for normalization. qRT-PCR was performed on Realplex system (Eppendorf) using GoTaq MasterMix (Promega).

### **mRNA Stability**

Approx.  $1 \times 10^6$  MEFs were seeded in 6 cm format were stimulated with IFN- $\gamma$  for 4 h and actinomycin D (Sigma) was added (5  $\mu$ g/ml). After 0, 15 30, 45 and 60 min of act D treatment RNA was isolated and processed for qRT-PCR analysis.

### **Antiviral Assay with Vesicular Stomatitis Virus**

MEFs were seeded on 3.5 cm dishes at 30% confluence and 24 h later they were treated with Cyclin C siRNA, control siRNA or left untreated. siRNA transfection was performed using Lipofectamine RNAiMAX (Invitrogen) according the manufacturer protocol and 50 pmol siRNA

per dish. After 48 hours of siRNA transfection cells were seeded on 96 well plates in normal medium and  $5 \times 10^3$  cells per well. Four hours after seeding the medium was replaced with new medium that was supplemented with fresh siRNA and IFN- $\gamma$  in two-fold serial dilutions starting at 10 units. The medium was again replaced 24 h later with medium without siRNA and without IFN- $\gamma$ . VSV was then added at the multiplicity of infection (MOI) of 0.1 and the cells were incubated for additional 39 h. The plates were then washed 2x with PBS (Dulbecco's PBS, PAA) and surviving cells were stained for 1 h at room temperature in the dark with Crystal violet (40 ml 1% crystal violet and 80 ml methanol, 300 ml dH<sub>2</sub>O). Cells were then washed twice with PBS, air dried and subsequently incubated with 100  $\mu$ l solubilization buffer (50/50 mixture of 0.1 M NaH<sub>2</sub>PO<sub>4</sub>, pH = 4.5 and 50% ethanol) per well. Crystal violet intensity, that was proportional to number of surviving cells, was determined at 595 nm using a microplate reader (BIO-RAD iMark).

### List of Antibodies Used for Western Blotting

pS727 STAT1 (Kovarik et al., 1998), dilution 1:1000  
 pY701 STAT1 (Cell Signalling, Cat. Nr. 9171), dilution 1:1000  
 C-terminus STAT1 (Kovarik et al., 1998), dilution 1:1000  
 N-terminus STAT1 (BD Biosciences, Cat. Nr. 610115), dilution 1:1000  
 pS727 STAT3 (Cell Signaling Cat. Nr. 9134), dilution 1:500  
 pY705 STAT3, (Cell Signaling, Cat. Nr. 9131), dilution 1:1000  
 STAT3 (Cell Signaling, Cat. Nr. 9139), dilution 1:1000  
 pS722 STAT4 (Santa Cruz, Cat. Nr. sc-28296), dilution 1:500  
 pY694 STAT4 (Cell Signaling, Cat. Nr. 5267), dilution 1:1000  
 STAT4 (Cell Signaling, Cat. Nr. 2653), dilution 1:1000  
 pS725/730 STAT5a/b (Abcam, Cat. Nr. ab36153), dilution 1:1000  
 pY694/699 STAT5a/b (Upstate-Millipore, Cat. Nr. 05-886), dilution 1:1000  
 STAT5a/b (Santa Cruz, Cat. Nr. sc-835), dilution 1:1000  
 CDK7 (Santa Cruz, Cat. Nr. sc-529), dilution 1:1000  
 CDK8 (Santa Cruz, Cat. Nr. sc-1521), dilution 1:500  
 CDK8 (Santa Cruz, Cat. Nr. sc-5612), dilution 1:300  
 CDK9 (Santa Cruz, Cat. Nr. sc-484), dilution 1:1000  
 pan ERK (BD Biosciences, Cat. Nr. 610123), dilution 1:2000

### List of Antibodies Used for Chromatin Immunoprecipitation (ChIP)

pS727 STAT1 (Kovarik et al., 1998), 5  $\mu$ l serum/ChIP  
 C-terminus STAT1 (Kovarik et al., 1998), 5  $\mu$ l serum/ChIP  
 RNAPII (Santa Cruz, Cat. Nr. sc-899), 4  $\mu$ g/ChIP  
 pS2 RNAPII (Bethyl, Cat. Nr. A300-654A), 0,7  $\mu$ g/ChIP  
 CDK8 (Santa Cruz, Cat. Nr. sc-1521), 5  $\mu$ g/ChIP  
 MED1 (also called TRAP220) (Santa Cruz, Cat Nr. Sc-5334X), 5  $\mu$ g/ChIP  
 Control rabbit IgG (Santa Cruz, Cat. Nr. sc-2027), 4  $\mu$ g/ChIP  
 Control goat IgG (Santa Cruz, Cat. Nr. sc-2028), 5  $\mu$ g/ChIP  
 Pre-immune serum (Kovarik et al., 1998), 1-2  $\mu$ l serum/ChIP

### List of Primers Used for ChIP

*Irf1* (GAS): Fwd- GGAGCACAGCTGCCTTGTACTT, Rev- CCCACTCGGCCTCATCATT  
*Irf1* (TSS): Fwd- TCCCGCTAAGTGTTTAGATTTC, Rev- TTCGGTTCGGCTTAGACTG  
*Irf1* (gene body): Fwd- TGCCTAGTTGCTTGTCTCTG, Rev- CTCCTGTGTGTGCTGCTGTC  
*Tap1* (TSS): Fwd- GGTCTGCCCCTCAATCTG, Rev- GCCTGTCGTGTTCTTCTCC  
*Tap1* (GAS): Fwd- AGGCGTGTCTAGTGATTTCG, Rev- CGTGAGCTGTCCAGAGTC  
*Tap1* (gene body): Fwd- TAGTGTTAAGAATCAGCCTTC, Rev- ATCCTGGAATCTCGGTTAC

*Gbp2* (GAS): Fwd- AGTGGTGCTAAAATTGTTGTGG, Rev- AGAAAGGAAGGAGAAAGATGGG  
*Gbp2* (TSS): Fwd- TCTACCTGAGAAGTCCTGAG, Rev- TTGCCAGAGAACTTGTGAG  
All primers are written in 5' - 3', and were designed using Beacon Designer software except for *Irf1* (GAS) which is from (Liu et al., 2004). Position in the gene locus is depicted in Figure S4.

### List of Primers Used for Quantitation of Gene Expression (qRT-PCR)

*Irf1*: Fwd- CCGAAGACCTTATGAAGCTCTTTG, Rev: GCAAGTATCCCTTGCCATCG  
*Tap1*: Fwd- CTGGCAACCAGCTACGGGT, Rev- TGAGAAAGAGGATGTGGTGGG  
*Gbp2*: Fwd- TGCTAAACTTCGGGAACAGG, Rev- GAGCTTGGCAGAGAGGTTTG  
*Irf8* (Ouyang et al., 2011): Fwd- GAGCGAAGTTCCTGAGATGG, Rev- TGGGCTCCTCTTGGTCATAC  
*Isg15* (Wood et al., 2012): Fwd- ATGGCCTGGGACCTAAAG, Rev- TTAGGCACACTGGTCCCC  
*Hprt*: Fwd- GGATTTGAATCACGTTTGTGTCAT, Rev- ACACCTGCTAATTTTACTGGCAA  
*ActB*: Fwd- CAACGAGCGGTTCCGATG, Rev- GCCACAGGATTCCATACCCA  
*Gbp2* (Primary Transcript): Fwd- ACAGCATCATTATTACATCAGG, Rev- ATACCGAGCCAGATAGGG  
*Tap1* (Primary Transcript): See *Tap1* (gene body) used for ChIP

### List of QuantiTect Primer Assays (Qiagen) for qRT-PCR

*Cdk8*: Mm\_Cdk8\_1\_SG, Cat. Nr. QT00158697  
*CycC*: Mm\_Ccnc\_1\_SG, Cat. Nr. QT00161420

## References

- Dolken, L., Ruzsics, Z., Radle, B., Friedel, C.C., Zimmer, R., Mages, J., Hoffmann, R., Dickinson, P., Forster, T., Ghazal, P., and Koszinowski, U.H. (2008). High-resolution gene expression profiling for simultaneous kinetic parameter analysis of RNA synthesis and decay. *RNA* 14, 1959-1972.
- Gentleman, R.C., Carey, V.J., Bates, D.M., Bolstad, B., Dettling, M., Dudoit, S., Ellis, B., Gautier, L., Ge, Y., Gentry, J., et al. (2004). Bioconductor: open software development for computational biology and bioinformatics. *Genome biology* 5, R80.
- Hauser, C., Schuettengruber, B., Bartl, S., Lagger, G., and Seiser, C. (2002). Activation of the mouse histone deacetylase 1 gene by cooperative histone phosphorylation and acetylation. *Mol Cell Biol* 22, 7820-7830.
- Knuesel, M.T., Meyer, K.D., Bernecky, C., and Taatjes, D.J. (2009a). The human CDK8 subcomplex is a molecular switch that controls Mediator coactivator function. *Genes Dev* 23, 439-451.
- Knuesel, M.T., Meyer, K.D., Donner, A.J., Espinosa, J.M., and Taatjes, D.J. (2009b). The human CDK8 subcomplex is a histone kinase that requires Med12 for activity and can function independently of mediator. *Mol Cell Biol* 29, 650-661.
- Kovarik, P., Stoiber, D., Eysers, P.A., Menghini, R., Neininger, A., Gaestel, M., Cohen, P., and Decker, T. (1999). Stress-induced phosphorylation of STAT1 at Ser727 requires p38 mitogen-activated protein kinase whereas IFN-gamma uses a different signaling pathway. *Proc Natl Acad Sci U S A* 96, 13956-13961.
- Kovarik, P., Stoiber, D., Novy, M., and Decker, T. (1998). Stat1 combines signals derived from IFN-gamma and LPS receptors during macrophage activation [published erratum appears in *EMBO J* 1998 Jul 15;17(14):4210]. *Embo J* 17, 3660-3668.



- Liu, B., Mink, S., Wong, K.A., Stein, N., Getman, C., Dempsey, P.W., Wu, H., and Shuai, K. (2004). PIAS1 selectively inhibits interferon-inducible genes and is important in innate immunity. *Nat Immunol* 5, 891-898.
- Ouyang, X., Zhang, R., Yang, J., Li, Q., Qin, L., Zhu, C., Liu, J., Ning, H., Shin, M.S., Gupta, M., *et al.* (2011). Transcription factor IRF8 directs a silencing programme for TH17 cell differentiation. *Nat Commun* 2, 314.
- Reiner, A., Yekutieli, D., and Benjamini, Y. (2003). Identifying differentially expressed genes using false discovery rate controlling procedures. *Bioinformatics (Oxford, England)* 19, 368-375.
- Sadzak, I., Schiff, M., Gattermeier, I., Glinitzer, R., Sauer, I., Saalmuller, A., Yang, E., Schaljo, B., and Kovarik, P. (2008). Recruitment of Stat1 to chromatin is required for interferon-induced serine phosphorylation of Stat1 transactivation domain. *Proc Natl Acad Sci U S A* 105, 8944-8949.
- Smyth, G.K. (2004). Linear models and empirical bayes methods for assessing differential expression in microarray experiments. *Statistical applications in genetics and molecular biology* 3, Article3.
- Tahirov, T.H., Babayeva, N.D., Varzavand, K., Cooper, J.J., Sedore, S.C., and Price, D.H. (2010). Crystal structure of HIV-1 Tat complexed with human P-TEFb. *Nature* 465, 747-751.
- Wood, L.M., Pan, Z.K., Seavey, M.M., Muthukumaran, G., and Paterson, Y. (2012). The ubiquitin-like protein, ISG15, is a novel tumor-associated antigen for cancer immunotherapy. *Cancer Immunol Immunother.* 61, 689-700.
